1 **Topaz1, an essential gene for murine spermatogenesis, down-regulates the expression of**  
2 **numerous testis-specific long non-coding RNAs**

3

4 *Short title:* Topaz1, long non-coding RNAs and spermatogenesis

5

6

7 Manon Chadourne<sup>1</sup>, Elodie Poumerol<sup>1</sup>, Luc Jouneau<sup>1</sup>, Bruno Passet<sup>2</sup>, Johan Castille<sup>2</sup>, Eli Sellem<sup>3</sup>, Eric

8 Pailhoux<sup>1</sup> and Béatrice Mandon-Pépin<sup>1\*</sup>

9

10

11 <sup>1</sup> Université Paris-Saclay, UVSQ, INRAE, BREED, 78350, Jouy-en-Josas, France; Ecole Nationale

12 Vétérinaire d'Alfort, BREED, 94700, Maisons-Alfort, France.

13

14 <sup>2</sup> Université Paris Saclay, INRAE, AgroParisTech, GABI, Jouy-en-Josas, France.

15

16 <sup>3</sup> R&D Department, ALLICE, Paris, France.

17

18

19 \* Corresponding author

20 E-mail: [beatrice.mandon-pepin@inrae.fr](mailto:beatrice.mandon-pepin@inrae.fr) (BMP)

21

## 22 **Abstract**

23 Spermatogenesis involves coordinated processes, including meiosis, to produce functional gametes.  
24 We previously reported *Topaz1* as a germ cell-specific gene highly conserved in vertebrates. *Topaz1*  
25 knockout males are sterile with testes that lack haploid germ cells because of meiotic arrest after  
26 prophase I. To better characterize *Topaz1*<sup>-/-</sup> testes, we used RNA-sequencing analyses at two different  
27 developmental stages (P16 and P18). The absence of TOPAZ1 disturbed the expression of genes  
28 involved in microtubule and/or cilium mobility, which was consistent with testicular histology showing  
29 the disruption of microtubules and centrosomes. Moreover, a quarter of P18 dysregulated genes are  
30 long non-coding RNAs (lncRNAs), and three of them are testis-specific and located in spermatocytes,  
31 their expression starting between P11 and P15. The suppression of one of them, *4939463O16Rik*, did  
32 not alter fertility although sperm parameters were disturbed and sperm concentration fell. The  
33 transcriptome of P18-*4939463O16Rik*<sup>-/-</sup> testes was altered and the molecular pathways affected  
34 included microtubule-based processes, the regulation of cilium movement and spermatogenesis. The  
35 absence of TOPAZ1 protein or *4930463O16Rik* produced the same enrichment clusters in mutant  
36 testes despite a contrasted phenotype on male fertility. In conclusion, TOPAZ1 appeared to stabilize  
37 the expression of numerous lncRNAs. Its suppression is not essential for fertility but required during  
38 the terminal differentiation of male gametes.

39

## 40 **Author Summary**

41 The *Topaz1* gene was initially characterized during the initiation of meiosis in the sheep fetal ovary. In  
42 order to determine its function, a KO of the murine gene was performed. In this species, only males  
43 were sterile and spermatogenesis was blocked before the first meiotic division. Here, we show that  
44 cytoskeletal elements are markedly disturbed in mutant testes, indicating that these elements play an  
45 important function in spermatogenesis. While the mitotic spindle of spermatogonia was normal, the  
46 meiotic spindle of spermatocytes was hemi-spindle-shaped and the homologous chromosome pairs

47 could position themselves on the equatorial plate. In addition, lncRNAs account for 25% of genes  
48 whose expression in testes varies significantly in the absence of *Topaz1*. This suggests a key role for  
49 these factors in spermatogenesis. Largely testis-specific, they may be involved in spermatogenesis and  
50 play a more or less critical role in mouse fertility, which probably also depends on their redundancies.

51

## 52 **Introduction**

53 In mammals, an organism derives from two parental haploid gametes, a maternal oocyte and paternal  
54 sperm. Meiosis is a highly specialized event that leads to the production of these haploid germ cells  
55 (Kleckner, 1996). In females, meiosis is initiated during fetal life while male germ cells are involved in  
56 the meiosis process around puberty. In males, meiosis is essential during spermatogenesis that  
57 involves mitotic division and the multiplication of spermatogonia, the segregation of homologous  
58 chromosomes and the spermiogenesis of haploid germ cells. This complex process of spermatogenesis,  
59 which progresses through precisely timed and highly organized cycles, is primordial for male fertility.  
60 All these different events are highly regulated and associated with the controlled expression of several  
61 testis-enriched genes. A previous study had demonstrated the essential role of *Topaz1* during meiosis  
62 in male mice (Luangpraseuth-Prosper et al., 2015). *Topaz1* is a highly conserved gene in vertebrates  
63 (Baillet et al., 2011). Its expression is germ cell-specific in mice (Baillet et al., 2011). The suppression of  
64 *Topaz1* in mice (*Topaz1*<sup>-/-</sup>) results in azoospermia (Luangpraseuth-Prosper et al., 2015). Male meiotic  
65 blockage occurs without a deregulation of chromosome alignment and TOPAZ1 is not involved in  
66 formation of the XY body or the maintenance of MSCI (Meiotic Sex Chromosome Inactivation). *Topaz1*  
67 depletion increases the apoptosis of mouse adult male pachytene cells and triggers chromosome  
68 misalignment at the metaphase I plate in mouse testes (Luangpraseuth-Prosper et al., 2015). This  
69 misalignment leads to an arrest at the prophase to metaphase transition during the first meiosis  
70 division (Luangpraseuth-Prosper et al., 2015). Microarray-based gene expression profiling of *Topaz1*<sup>-/-</sup>  
71 mouse testes revealed that TOPAZ1 influences the expression of one hundred transcripts, including

72 several long non-coding RNA (lncRNAs) and unknown genes, at postnatal day 20 (P20) (Luangpraseth-  
73 Prosper et al., 2015).

74 Since discovery of the maternal *H19* lncRNA (Brannan et al., 1990) and the *Xist* (Brockdorff et al., 1992)  
75 genes that regulate the structure of chromosomes and mediate gene repression during X chromosome  
76 inactivation, interest in studying the role of non-coding RNAs (ncRNAs) has grown considerably. Non-  
77 coding RNAs are present in many organisms, from bacteria to humans, where only 1.2% of the human  
78 genome codes for functional proteins (Carninci et al., 2005; ENCODE Project Consortium et al., 2007;  
79 Gil and Latorre, 2012). While much remains to be discovered about the functions of ncRNAs and their  
80 molecular interactions, accumulated evidence suggests that ncRNAs participate in various biological  
81 processes such as cell differentiation, development, proliferation, apoptosis and cancers.

82 They are divided into two groups: small and long non-coding RNAs (sncRNAs and lncRNAs,  
83 respectively). SncRNAs contain transcripts smaller than 200 nucleotides (nt). They include microRNAs  
84 (miRNAs, 20-25 nt), small interfering RNAs (siRNAs), PIWI-interacting RNAs (piRNAs, 26-31 nt) and  
85 circular RNAs (cricRNA). These sncRNAs are essential for several functions such as the regulation of  
86 gene expression and genome protection (Ref in (Morris and Mattick, 2014)) as well as during  
87 mammalian spermatogenesis (Yadav and Kotaja, 2014; Bie et al., 2018; Quan and Li, 2018). The second  
88 group, lncRNAs, contains transcripts longer than 200 nt without a significant open reading frame.  
89 Advances in high-throughput sequencing have enabled the identification of new transcripts, including  
90 lncRNAs, most of which are transcribed by RNA polymerase II and possess a 5' cap and polyadenylated  
91 tail (ref in (Jarroux et al., 2017)). They are classified according to their length, location in the genome  
92 (e.g. surrounding regulatory elements) or functions.

93 Several studies have pointed out that testes contain a very high proportion of lncRNA compared to  
94 other organs (Necsulea and Kaessmann, 2014; Sarropoulos et al., 2019). However, this high testicular  
95 expression is only observed in the adult organ, as the level of lncRNAs in the developing testis is  
96 comparable to that seen in somatic organs (Sarropoulos et al., 2019). In mice, some testis-expressed  
97 lncRNAs were functionally characterized during spermatogenesis. Thus, the lncRNA *Mrhl* repressed

98 *Wnt* signaling in the Gc1-Spg spermatogonial cell line, suggesting a role in spermatocyte differentiation  
99 (Arun et al., 2012). Expression of the Testis-specific X-linked gene was specific to, and highly abundant  
100 in, mouse pachytene-stage spermatocytes and could regulate germ cell progression in meiosis  
101 (Anguera et al., 2011). Moreover, in male germ cells, it has been shown that the *Dmrt1*-related gene  
102 negatively regulates *Dmrt1* (doublesex and mab-3 related transcription factor 1) and that this  
103 regulation might be involved in the switch between mitosis and meiosis in spermatogenesis (Zhang et  
104 al., 2010). Lastly, in a non-mammalian model as *Drosophila*, Wen *et al.* produced mutant fly lines by  
105 deleting 105 testis-specific lncRNAs and demonstrated the essential role of 33 of them in  
106 spermatogenesis and/or male fertility (Wen et al., 2016).

107         Following a previous study, which presented comparative microarray analyses of wild-type and  
108 *Topaz1*<sup>-/-</sup> testis RNAs at P15 and P20 (Luangpraseuth-Prosper et al., 2015), we have now performed  
109 deep sequencing by bulk RNA-sequencing (RNA-seq) of these testes collected at P16 and P18 in an aim  
110 to refine the developmental stages that display transcriptional differences between the two mouse  
111 lines. Since the proportion of deregulated lncRNAs represented about a quarter of the differentially  
112 expressed genes (DEGs), we studied the testicular localization of three of them. In order to approach  
113 the role of testicular lncRNAs, we created a mouse line in which one of them was deleted  
114 (*4930463O16Rik*). These knockout mice displayed normal fertility in both sexes, but the male mutants  
115 produced half as much sperm as wild-type controls.

116

## 117 **Results**

### 118 ***Topaz1* mutant testes have a deregulated transcriptome as early as P16.**

119 To expand on the previous comparative microarray analyses of wild-type and mutant testes RNA  
120 performed at P15 and P20 during the first wave of spermatogenesis (Luangpraseuth-Prosper et al.,  
121 2015), transcriptomic analyses by RNA-seq were performed on WT and *Topaz1*<sup>-/-</sup> mouse testes at two  
122 developmental stages: P16 and P18. The P16 stage was chosen because these previous microarray

123 analyses had revealed that only the *Topaz1* gene was expressed differently at P15, its expression  
124 starting from 5 *dpp*. This means that TOPAZ1 should have had an effect just after P15. Furthermore,  
125 whereas at P15, seminiferous tubules contain spermatocytes that have advanced to mid and late-  
126 pachytene, at P16 they contain spermatocyte cells that have progressed from the end-pachytene to  
127 early diplotene of meiosis I. At P20, the first round spermatids appear, while late-pachytene  
128 spermatocytes are abundant at P18 and the very first spermatocytes II appear (Drumond et al., 2011).  
129 Therefore, the P16 and P18 stages chosen for this study surrounded as closely as possible the time  
130 lapse just before and after the first meiosis I division of spermatogenesis.

131

132 Differential analyses of RNA-seq results revealed that 205 and 2748 genes were significantly  
133 deregulated in *Topaz1*<sup>-/-</sup> testes compared to WT at P16 and P18, respectively (adjusted p-value  
134 (Benjamini-Hochberg) <0.05 and absolute Log2 Fold Change >1 (Log2FC>1) (Figure 1A, Supplementary  
135 Table 1). At P16, out of the 205 DEGs, 97 genes were significantly down-regulated (Log2FC<-1 or  
136 FC<0.5) and 108 were up-regulated (Log2FC>1 or FC>2). However, at P18, down-regulated DEGs  
137 accounted for 91% (2491 genes) and up-regulated genes for only 9% (257 genes). Among all these  
138 DEGs, 120 were common to both P16 and P18 (Figure 1A). According to the mouse gene atlas, the  
139 2748 DEGs at developmental stage P18 were largely testis-enriched DEGs in mouse testis-specific  
140 genes (Figure 1B).

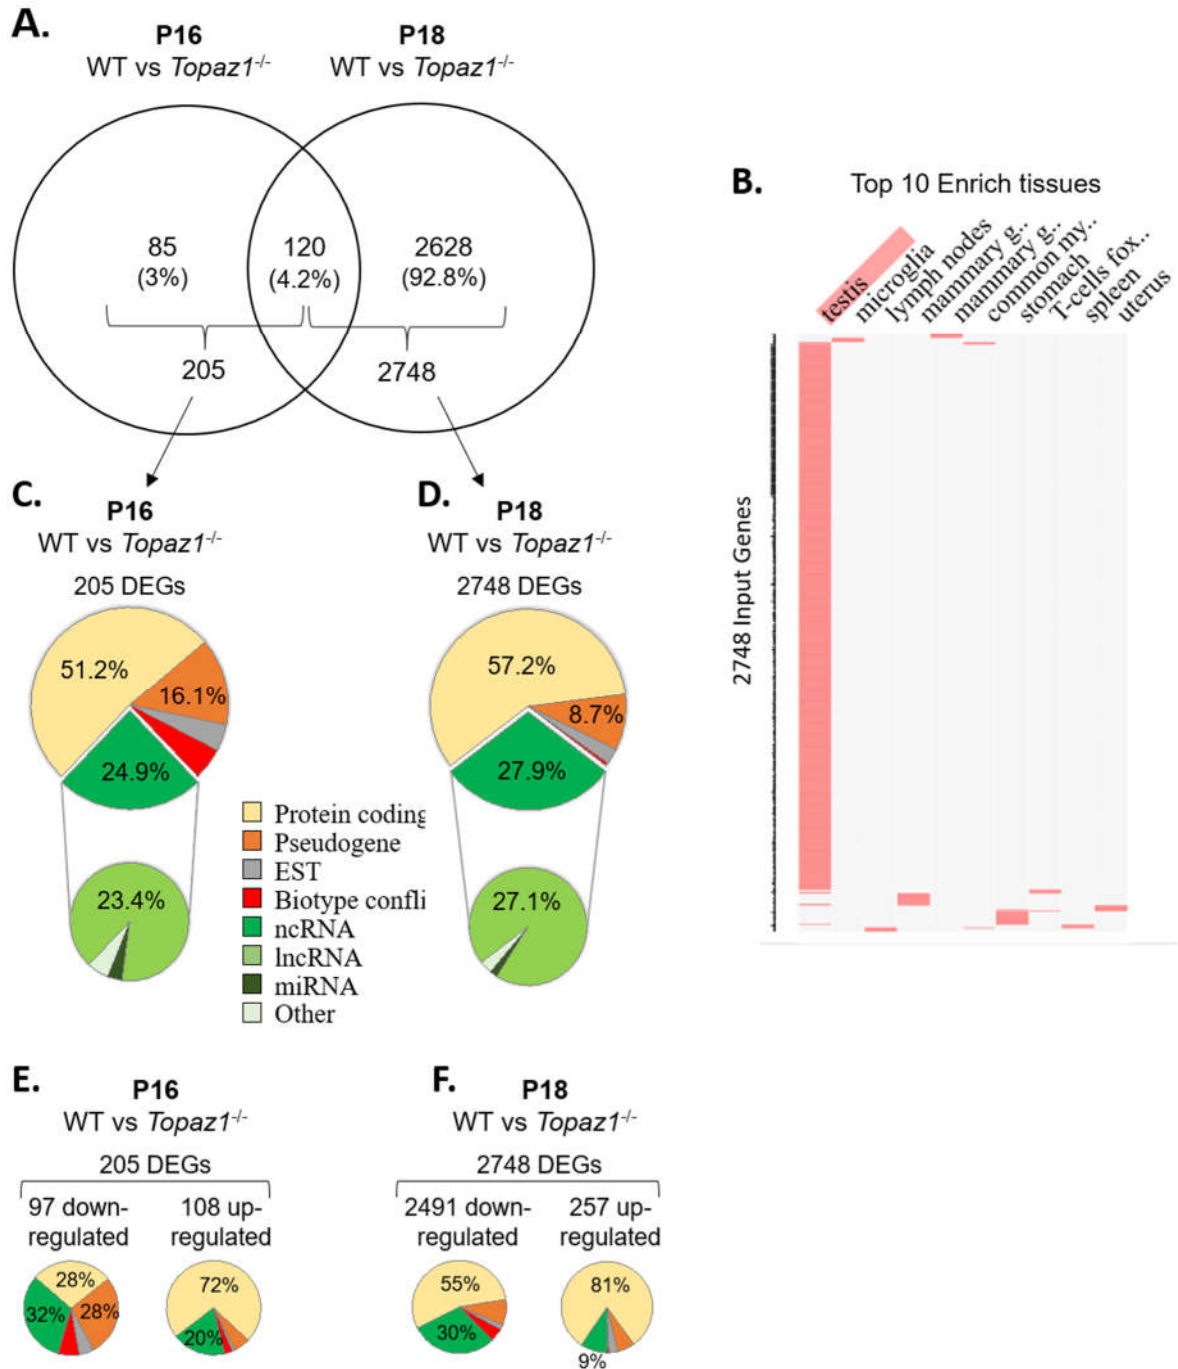

141

142 **Figure 1: WT vs *Topaz1*<sup>-/-</sup> deregulated gene analysis from mouse testes.**

143 (A) Venn diagram showing the overlap of differentially expressed genes between P16 and P18 *Topaz1*<sup>-/-</sup> mouse

144 testes (adjusted  $p < 0.05$  and down-regulated  $FC < 0.5$  ( $\log_2 FC < -1$ ) or up-regulated  $FC > 2$  ( $\log_2 FC > 1$ )). (B)

145 Clustergram was generated by the Enrichr website. Top 10 enriched tissues are the columns, input genes

146 (2748 DEGs of P18 *Topaz1*<sup>-/-</sup> compared to normal testes) are the rows, and cells in the matrix indicate whether a

147 DEG is associated with a tissue from the Mouse Gene Atlas. (C-D) Biotype of DEGs in *Topaz1*<sup>-/-</sup> testes at (C) P16

148 and (D) P18. Around half of them are protein-coding genes whereas around one quarter is ncRNA at both  
149 developmental stages. (E-F) Biotype of DEGs in *Topaz1*<sup>-/-</sup> testes at (E) P16 and (F) P18, depending on whether  
150 they were up- or down-regulated.

151

152 The validation of several DEGs was achieved using RT-qPCR. Two randomly selected genes up-  
153 regulated at P16 (*B3galt2* and *Hp*) and three at P18 (*B3galt2*, *Afm* and *Cx3cr1*), four gene down-  
154 regulated at P16 and P18 (*Gstt2*, *4930463O16Rik*, *4921513H07Rik* and *Gm21269*) and two non-  
155 differential genes (*Cdc25c* and *Nop10*) were analyzed (Supplementary Figure 1). The results confirmed  
156 those obtained using RNA-seq.

157 The biotypes of the differential transcripts (protein-coding, non-coding RNAs, etc.) were determined  
158 from the annotations of the NCBI, MGI and Ensembl databases. Two major deregulated groups were  
159 highlighted at both stages. The protein-coding gene biotype accounted for half of the deregulated  
160 genes (51.2% and 57.2% at P16 and P18, respectively) (Figure 1C-D). A quarter of *Topaz1*<sup>-/-</sup> DEGs; 24.9%  
161 and 27.9% at P16 and P18, respectively, was found to belong to the second ncRNA group. Among the  
162 latter, the major biotype was lncRNAs at both stages, being 23.4% and 27.1% at P16 and P18,  
163 respectively. This significant proportion of deregulated lncRNA thus raised the question of their  
164 potential involvement in spermatogenesis.

165

## 166 **Pathway and functional analysis of DEGs**

167 To further understand the biological functions and pathways involved, these DEGs were functionally  
168 annotated based on GO terms and KEGG pathway or on InterPro databases through the ontological  
169 Database for Annotation, Visualization and Integrated Discovery (DAVID v6.8,  
170 <https://david.ncifcrf.gov/>) using the default criteria (Huang et al., 2009a, 2009b).

171 At P16, so therefore before the first meiosis division, out of 205 differentially expressed genes, 32% of  
172 down-regulated and 20% of up-regulated genes corresponded to non-coding RNAs with no GO  
173 annotation or no pathway affiliation for the vast majority (Figure 1E), leading to less powerful



174 functional annotation clustering (Supplementary Table 2). Five clusters with an enrichment score >1.3  
175 were obtained (an enrichment score >1.3 was used for a cluster to be statistically significant, as  
176 recommended by Huang et al., (Huang et al., 2009a) but the number of genes in each cluster was small  
177 except for annotation cluster number 4. In this, an absence of TOPAZ1 appeared to affect the  
178 extracellular compartment. The others referred to the antioxidant molecular function and the  
179 biological detoxification process, suggesting stressful conditions.

180 At P18, corresponding to the first transitions from prophase to metaphase, and considering either all  
181 DEGs (2748 DEGs; 2404 DAVID IDs) or only down-regulated genes (2491 DEGs; 2164 DAVID IDs) in the  
182 P18 *Topaz1*<sup>-/-</sup> versus WT testes, it was possible to identify five identical clusters with an enrichment  
183 score higher than 12 (Figure 1F, Supplementary Table 3). However, the enrichment scores were higher  
184 when only down-regulated genes were considered. These clusters include the following GO terms: (i)  
185 for cellular components: motile cilium, ciliary part, sperm flagellum, axoneme, acrosomal vesicle; (ii)  
186 for biological processes: microtubule-based process, spermatogenesis, germ cell development,  
187 spermatid differentiation (Supplementary Table 3).

188 Finally, using the InterPro database, four clusters with enrichment scores >1.3 were obtained based  
189 on down-regulated genes (Supplementary Table 3) and with up-regulated genes, an absence of  
190 TOPAZ1 from mouse testes highlighted the biological pathway of the response to external stimulus or  
191 the defense response in the testes. Once again, and as for P16, this suggested stressful conditions in  
192 these *Topaz1*<sup>-/-</sup> testes.

193 These results indicate that an absence of TOPAZ1 induced alterations to the murine transcriptome of  
194 the mutant testis transcriptome as early as 16 days after birth. Two days later (P18), these effects were  
195 amplified and predominantly involved a down-regulation of genes (91% of DEGs). The loss of TOPAZ1  
196 appeared to disrupt the regulation of genes involved in microtubule and/or cilium mobility,  
197 spermatogenesis and first meiotic division during the prophase to metaphase transition. This was in  
198 agreement with the *Topaz1*<sup>-/-</sup> phenotype in testes.

199

200 **Absence of TOPAZ1 leads to drastic cytoplasmic defects before the first meiotic division**

201 According to the preceding GO pathway analyses showing that a majority of deregulated proteins are  
202 involved in microtubule cytoskeleton organization, microtubule-based movements and processes,  
203 microtubule organizing centers, centrosomes and centrioles in P18 *Topaz1*<sup>-/-</sup> testes (Supplementary  
204 Table 3), we decided to better characterize the cytoplasmic components of germ cells in *Topaz1*<sup>-/-</sup>  
205 testes before the first meiotic division. As the meiotic spindle is a key component of these cells before  
206 and during the metaphase stage, we studied it using  $\alpha$ - and  $\gamma$ -tubulin immunofluorescence (IF) staining  
207 for markers of microtubule spindle and centrosome, respectively (Figure 2). We observed one  
208 monopolar spindle centered in the germ cells of the *Topaz1*<sup>-/-</sup> testes. Moreover, centrosome staining  
209 was diffuse and weak in these cells. This was also observed on entire seminiferous sections  
210 (Supplementary Figure 2). The chromosomes were not aligned along a metaphase plate but adopted  
211 an atypical rosette shape (Figure 2), reflecting a marked perturbation of the microtubule and  
212 centrosome pathways in *Topaz1*-deficient spermatocytes that could lead to meiotic arrest.

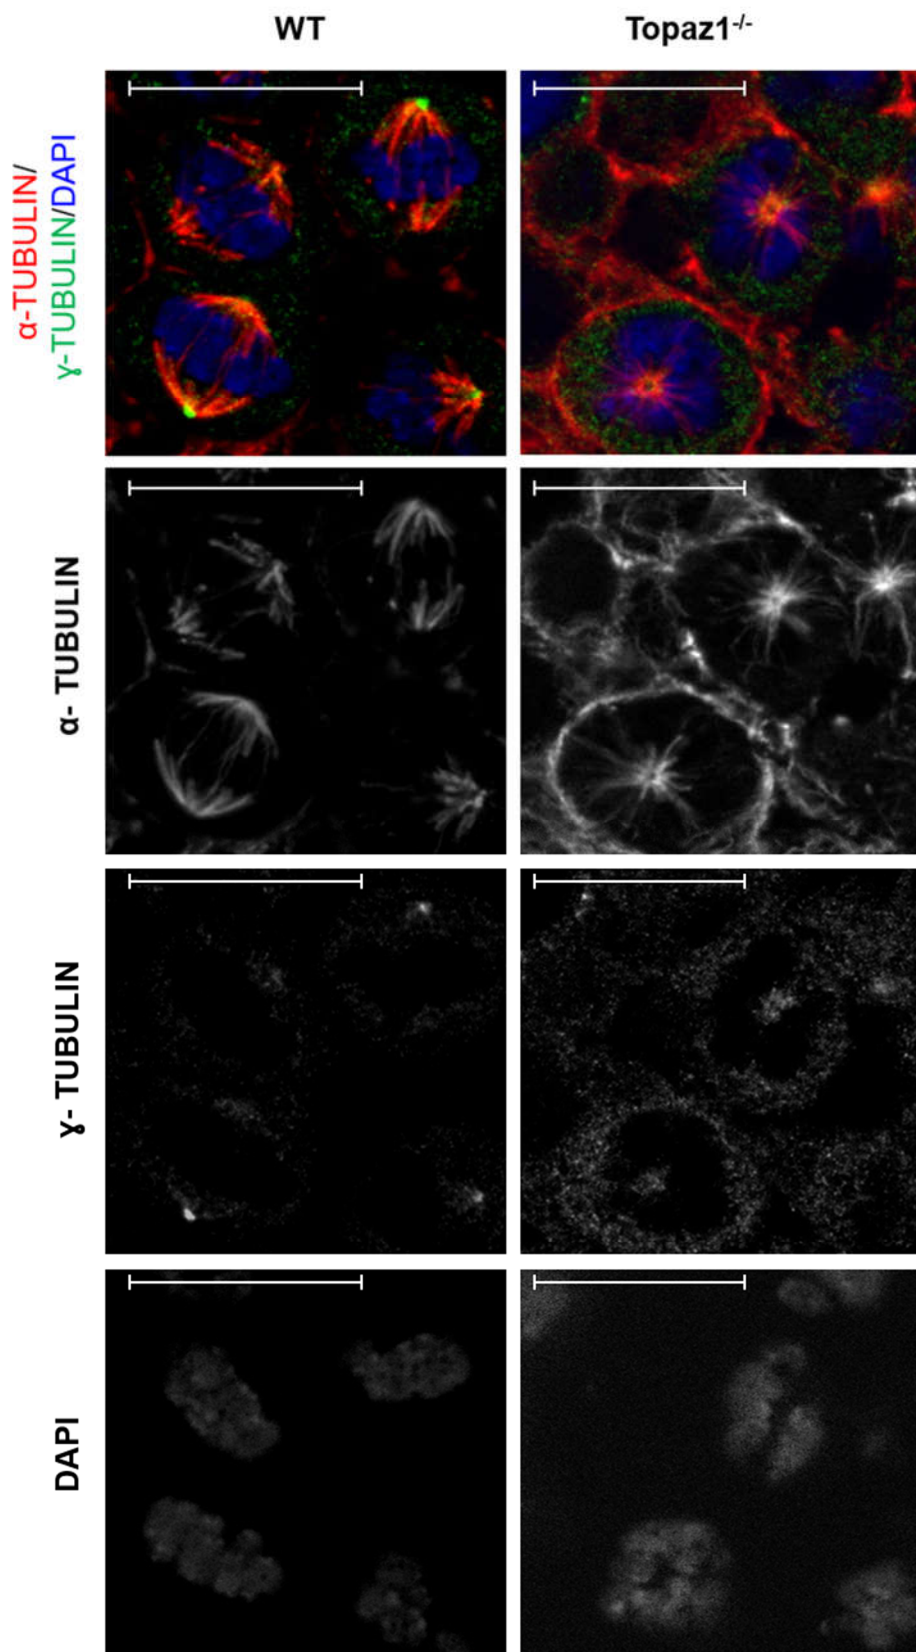

213

214 **Figure 2: Abnormal metaphase phenotype in *Topaz1*-deficient gonads.**

215 Immunofluorescence staining for  $\alpha$ -TUBULIN (red),  $\gamma$ -TUBULIN (green) and DAPI (blue) in WT (left) and *Topaz1*<sup>-/-</sup>  
216 (right) 28 *dpp* testes sections. Unlike the meiotic metaphases seen in normal testes (left), the metaphases are  
217 abnormal in *Topaz1*<sup>-/-</sup> mutants (right) with an atypical rosette shape and hemispindle. Scale bar = 20 $\mu$ m

218

### 219 **Selection of 3 deregulated lncRNA: all spermatocyte-specific**

220 The vast majority of deregulated lncRNAs in *Topaz1*<sup>-/-</sup> testes has an unknown function. We decided to  
221 study three of the 35 down-regulated lncRNAs that are shared at the P16 and P18 stages, namely  
222 *4930463O16Rik* (ENSMUSG00000020033), *4921513H07Rik* (ENSMUSG00000107042) that is the most  
223 down-regulated gene at P16 with a Log2FC of 11.85, and both already highlighted by the previous  
224 microarray comparative analyses (Luangpraseuth-Prosper et al., 2015), and *Gm21269*  
225 (ENSMUSG00000108448), which has the lowest adjusted p-value at P18. We quantified these  
226 transcripts by qPCR in several somatic tissues (brain, heart, liver, lung, small intestine, muscle, spleen,  
227 kidney, epididymis and placenta) and in the gonads (testes and ovary). These three lncRNAs were  
228 almost exclusively expressed in testes (Figure 3A, C, E). These results were in agreement with RNA-seq  
229 data available for *4930463O16Rik* and *Gm21269* on the ReproGenomics viewer  
230 (<https://rgv.genouest.org/>) (Supplementary Figures 3A and 4A, respectively) (Darde et al., 2015, 2019).  
231 Our RNA-seq results, summarized using our read density data (bigwig) and the Integrative Genomics  
232 Viewer (IGV; <http://software.broadinstitute.org/software/igv/>), revealed little or no expression of  
233 these three genes in *Topaz1*<sup>-/-</sup> testes (Supplementary Figure 5A-C).

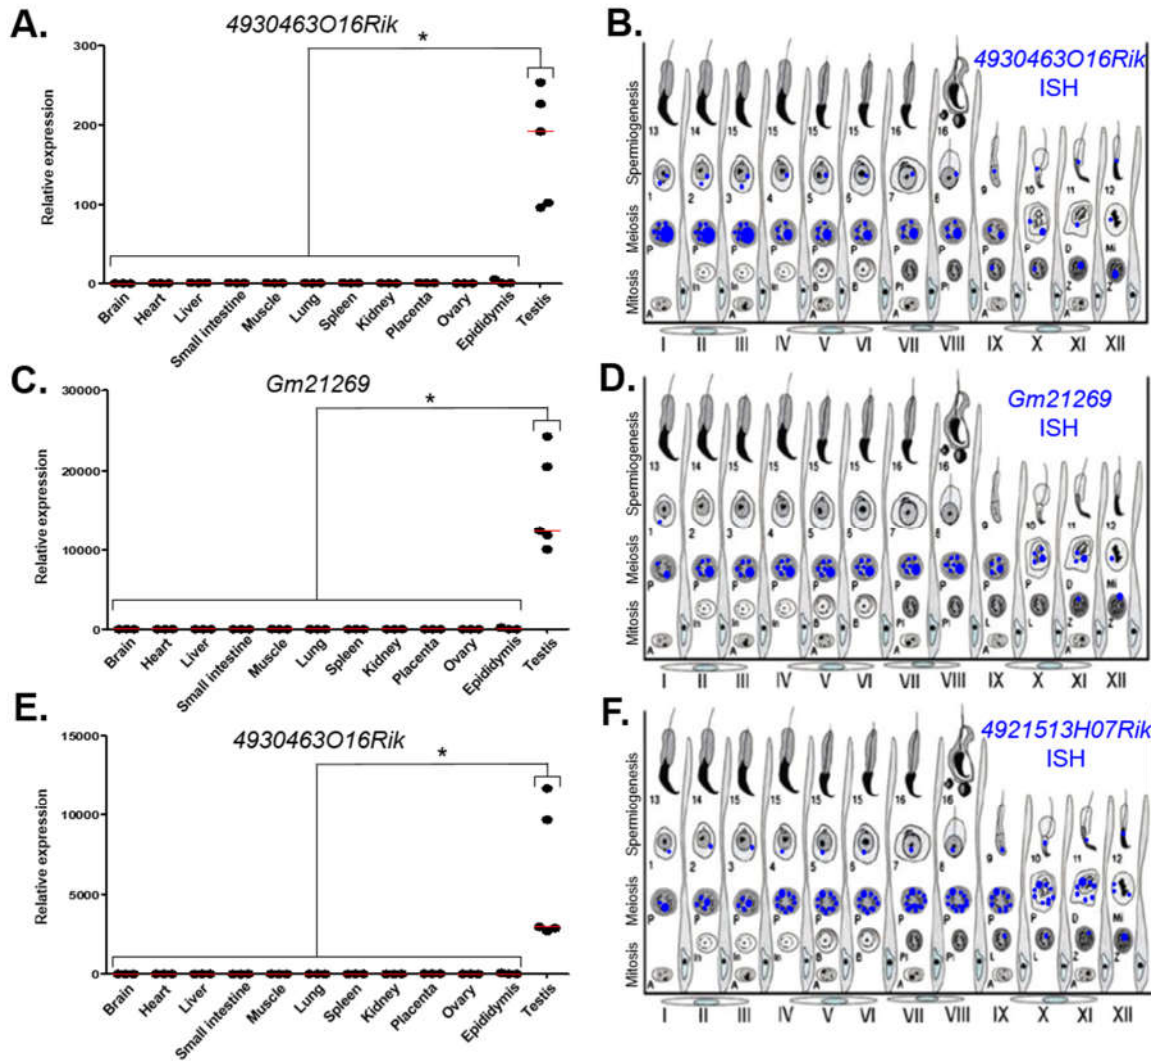

234

235 **Figure 3: Expression analysis of three lncRNAs.**

236 (A-C-E) RT-qPCR analysis of three different lncRNAs. (A) *4930463O16Rik*; (C) *Gm21269*; (E) *4921513H07Rik* in

237 different two month-old tissues from WT mice. The red lines represent the median for each tissue; n=5 for testes

238 and n=3 for other organs. Statistical analyses were performed using the non-parametric Kruskal-Wallis test. \* =

239 p<0.05 (B-D-F) Schematic representation of the results of (B) *4930463O16Rik*, (D) *Gm21269* and (F)

240 *4921513H07Rik* ISH expression in meiotic and post-meiotic cells of the WT mouse seminiferous epithelial cycle.

241

242 Quantification of these transcripts using qPCR from postnatal to adulthood in WT and *Topaz1*<sup>-/-</sup> testes

243 had previously been reported, as for *4930463O16Rik* and *4921513H07Rik* (Figure 9 in (Luangpraseth-

244 Prosper et al., 2015)) or performed for *Gm21269* (Supplementary Figure 6, also including the postnatal

245 expression of *4930463O16Rik* and *4921513H07Rik*). The difference in expression between normal and  
246 *Topaz1<sup>-/-</sup>* testes was detected as being significant as early as P15 (detected as insignificant in the  
247 previous microarray analysis and *Gm21269* was absent from the microarray employed). All showed an  
248 absence of expression, or at least an important down-regulation, in mutant testes.

249

250 To determine the testicular localization of these lncRNA, *in situ* hybridization (*ISH*) on adult WT testes  
251 sections was performed (Supplementary Figure 7) and the results summarized (Figure 3B, D, F). These  
252 lncRNAs were expressed in spermatocytes and the most intense probe labeling was observed at the  
253 pachytene stage. These results were confirmed by data on the ReproGenomics viewer for  
254 *4930463O16Rik* and *Gm21269* (<https://rgv.genouest.org/>) (Supplementary Figures 3B and 4B) (Darde  
255 et al., 2015, 2019).

256 To refine the subcellular localization of these transcripts in adult mouse testes, we paired *ISH*  
257 experiments and the IF staining of DDX4 protein (or Mvh, Mouse Vasa homolog). DDX4 is a germ cell  
258 cytoplasmic marker of germ cells, especially in the testes (Toyooka et al., 2000). Our results showed  
259 that the three lncRNAs observed displayed different intensities of expression depending on  
260 seminiferous epithelium stages. *4930463O16Rik* was expressed in the nucleus of spermatocytes with  
261 diffuse fluorescence, surrounded by cytoplasmic DDX4 labelling from the zygotene to the diplotene  
262 stages (Figure 4A-B-C). At the same spermatocyte stages (zygotene to diplotene), a diffuse labelling of  
263 *Gm21269*, similar to that of *4930463O16Rik*, was observed but with the addition of dot-shaped  
264 labelling that co-localized with DDX4 fluorescence (Figure 4D, E, F). *Gm21269* was therefore localized  
265 in the cytoplasm and nuclei of spermatocytes during meiosis. *4921513H07Rik* appeared to be  
266 cytoplasmic, with fluorescent red dots (*ISH*) surrounding the nuclei, and located in close proximity to  
267 DDX4 (IF) labelling (Figure 4G, H, I). At other stages, identified by DDX4 staining, *ISH* labelling of these  
268 three lncRNA revealed single dots in a few spermatogonia and in round spermatids. The same  
269 experiment was then repeated: *ISH* was followed by IF staining of  $\gamma$ H2Ax to highlight the sex body in

270 spermatocytes (Supplementary Figure 8). No co-localization between the sex body and the three  
271 lncRNA was revealed.  
272  
273 Taken together, these results indicate that these spermatocyte-specific lncRNAs had different  
274 subcellular localizations in spermatocytes, suggesting functions in these male germ cells.  
275

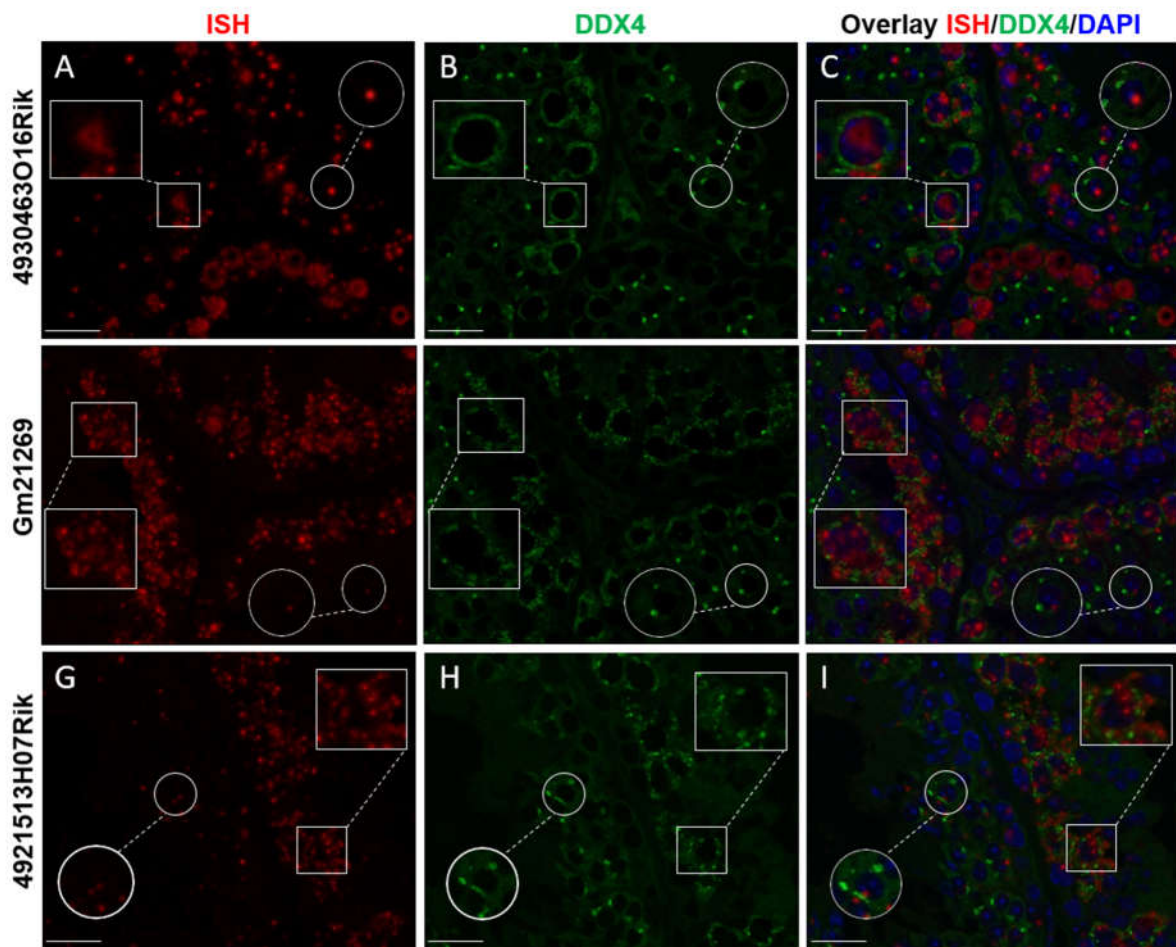

276

277 **Figure 4: lncRNA cellular localizations on WT two month-old mouse testes.**

278 *In situ* hybridization using (A) *4930463O16Rik*, (D) *Gm21269* and (G) *4921513H07Rik* probes (red). (B-E-H)  
279 Immunofluorescence staining with DDX4 antibody was achieved at the same stage of seminiferous epithelium to  
280 identify male germ cells (green). (C-F-I) DAPI (blue), visualizing nuclear chromosomes, was merged with ISH  
281 (green) and IF (red) signals. Zooms in white squares show spermatocytes during the first meiotic division

282 (zygotene to diplotene stages). Zooms in circles show spermatid cells with one spot of DDX4 staining per cell.  
283 Scale bar = 20  $\mu$ m.

284

### 285 **Generation of *4930463O16Rik*-deleted mice**

286 In order to evaluate a potential role in spermatogenesis for one of these lncRNAs, *4930463O16Rik* (the  
287 nuclear expressed gene), it was decided to suppress its expression in a mouse knockout model.

288 The *4930463O16Rik* gene (Chr10: 84,488,293-84,497,435 - GRCm38:CM001003.2) is described in  
289 public databases as consisting of four exons spanning approximately 10 kb in an intergenic locus on  
290 mouse chromosome 10. Using PCR and sequencing, we confirmed this arrangement (data not shown).

291 In order to understand the role of *4930463O16Rik*, a new mouse line depleted of this lncRNA was  
292 created using CRISPR/Cas9 technology (Figure 5A). Briefly, multiple single guide RNAs (sgRNAs) were  
293 chosen, two sgRNAs in 5' of exon 1 and two sgRNAs in 3' of exon 4, so as to target the entire length of  
294 this gene (Figure 5A, C) and enhance the efficiency of gene deletion in the mouse (Han et al., 2014).

295 Mice experiencing disruption of the target site were identified after the Sanger sequencing of PCR  
296 amplification of the genomic region surrounding the deleted locus (Figure 5D). *4930463O16Rik*<sup>+/-</sup> mice  
297 were fertile and grew normally. Male and female *4930463O16Rik*<sup>+/-</sup> animals were mated to obtain  
298 *4930463O16Rik*<sup>-/-</sup> mice. Once the mouse line had been established, all pups were genotyped with a  
299 combination of primers (listed in Supplementary Table 4) (Figure 5B).



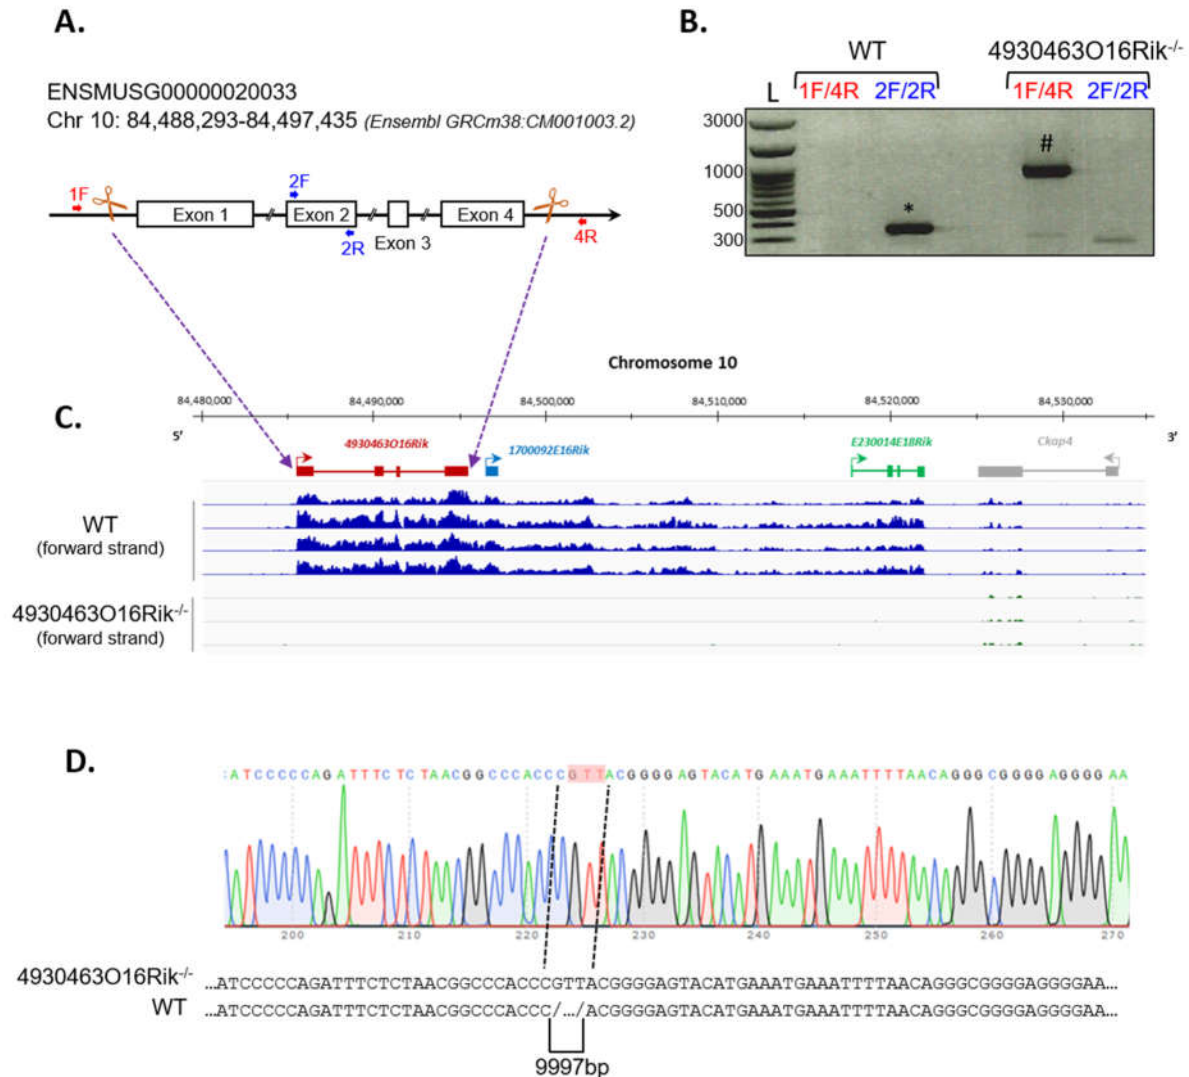

300

301 **Figure 5: Deletion of the *4930463O16Rik* gene in the mouse.**

302 (A) Schematic design of CRISPR/Cas9 deletion of the *4930463O16Rik* gene with the suppression of 4 exons and

303 3 introns. The white boxes and lines represent exons and introns, respectively. (B) PCR genotyping on DNA of WT

304 and *4930463O16Rik*<sup>-/-</sup> mice. The primer pairs used 1F/4R (located in 5' of exon 1 and in 3' of exon 4 of the

305 *4930463O16Rik* gene, respectively) or 2F/2R (located in the exon2 of *4930463O16Rik*) to determine the

306 genotypes of the mice. Results showed the following amplicon sizes: (\*) 352 bp with the 2F/2R primers in WT

307 (no amplification in mutant mice); (#) 935 bp with the 1F/4R primers in *4930463O16Rik*<sup>-/-</sup> mice (no amplification

308 in WT mice under the PCR conditions used). (L) DNA ladder. (C) Transcription of the forward strand of

309 chromosome 10 around the *4930463O16Rik* gene with RNA-seq coverage (BigWig format representation) in WT

310 (top blue tracks) and *4930463O16Rik*<sup>-/-</sup> (bottom tracks) mouse P18 testes. A continuous (WT) or very low

311 transcription (*4930463O16Rik*<sup>-/-</sup>) was observed from *4930463O16Rik* to *E230014E18Rik* genes. (D)

312 Electrophoregram of *4930463O16Rik*<sup>-/-</sup> mouse genomic DNA showing 9997 bp deletion and the insertion of 3  
313 nucleotides (GTT, highlighted in pink).

314

### 315 **The absence of *4930463O16Rik* does not affect mouse fertility**

316 Fertility was then investigated in *4930463O16Rik*-deficient mice. Eight-week-old male and female  
317 *4930463O16Rik*<sup>-/-</sup> mice were mated, and both sexes were fertile. Their litter sizes ( $7.5 \pm 2.10$  pups per  
318 litter,  $n=28$ ) were similar to those of their WT counterparts ( $6.9 \pm 2.12$  pups per litter,  $n=20$ ). There  
319 were no significant differences in terms of testicular size, testis morphology and histology and cauda  
320 and caput epididymis between WT and *4930463O16Rik*<sup>-/-</sup> adult mice (Figure 6A, B). In addition, the  
321 different stages of seminiferous tubules divided into seven groups were quantified between  
322 *4930463O16Rik*<sup>-/-</sup> and WT adult mice. No significant differences were observed between the two  
323 genotypes (Figure 6C). These results therefore demonstrated that *4930463O16Rik* is not required for  
324 mouse fertility.

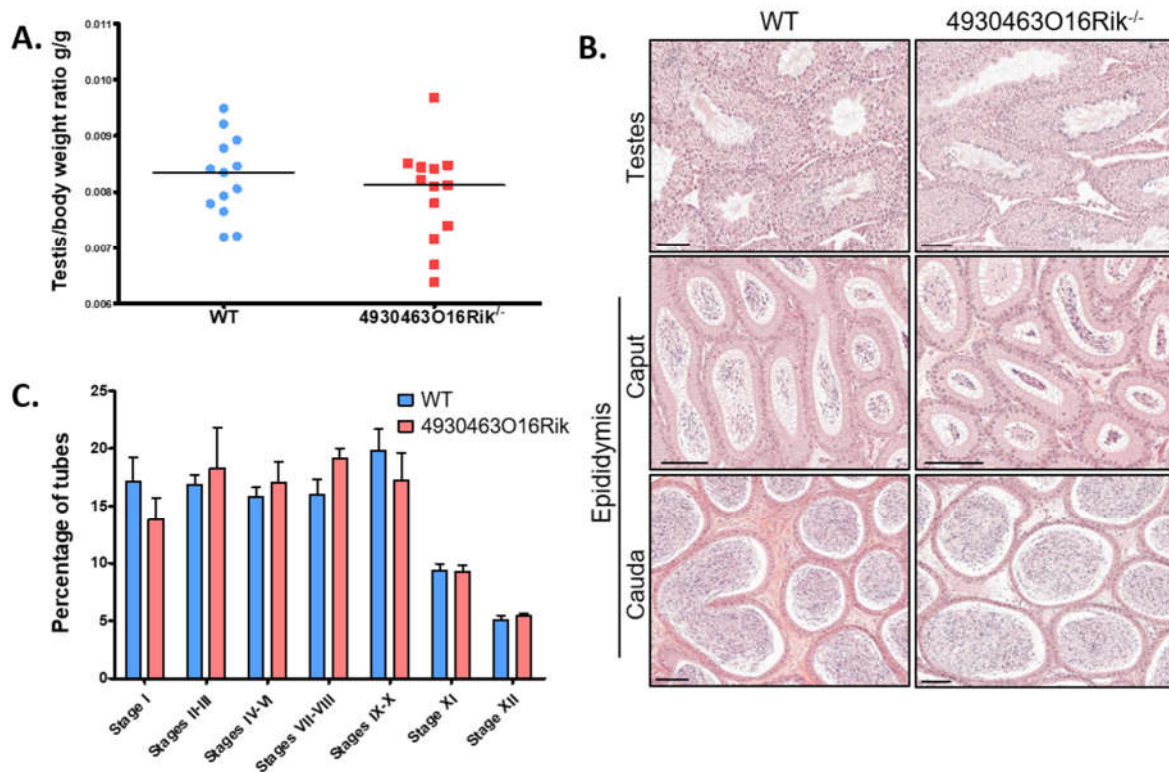

325

326 **Figure 6: Study of *4930463O16Rik*<sup>-/-</sup> testicular phenotype.**

327 (A) Testis/body weight ratio of 8 week-old mice. No significant difference was observed in the two mouse lines.  
328 Median lines are in black. (B) Hematoxylin and eosin (HE) staining of testis and epididymis sections from WT and  
329 *4930463O16Rik*<sup>-/-</sup> 8 week-old mice. Scale bar=50 µm. Spermatozoa were visible in the lumen of the testes and  
330 epididymis of WT and *4930463O16Rik*<sup>-/-</sup> mice. (C) Quantification of the different seminiferous epithelium stages  
331 in WT and *4930463O16Rik*<sup>-/-</sup> 8 week-old mice. No significant difference was found between WT and  
332 *4930463O16Rik*<sup>-/-</sup> mice.

333

### 334 ***4930463O16Rik*<sup>-/-</sup> mice present modified sperm parameters**

335 The sperm parameters of 8-week-old *4930463O16Rik*-deficient testes were compared to WT testes of  
336 the same age. Sperm concentrations obtained from the epididymis of *4930463O16Rik*<sup>-/-</sup> mice were  
337 significantly reduced by 57.2% compared to WT (Figure 7A) despite an unmodified testis/body weight  
338 ratio (Figure 6A). Motility parameters such as the percentage of motile spermatozoa, the motile mean  
339 expressed as beat cross frequency (bcf) and progressive spermatozoa were significantly higher in  
340 *4930463O16Rik*<sup>-/-</sup> mice compared to WT (Figure 7B, C, D). From a morphological point of view,  
341 however, two parameters were significantly modified in the testes of mutant mice: the distal mid-  
342 piece reflex (DMR), a defect developing in the epididymis and indicative of a sperm tail abnormality  
343 (Johnson, 1997) and the percentage of spermatozoa with coiled tail (Figure 7E, F). In addition, two  
344 kinetic parameters were also significantly reduced in mutant sperm: the motile mean vsl, related to  
345 the progressive velocity in a straight line and the average path velocity, or vap (Figure 7G, H).

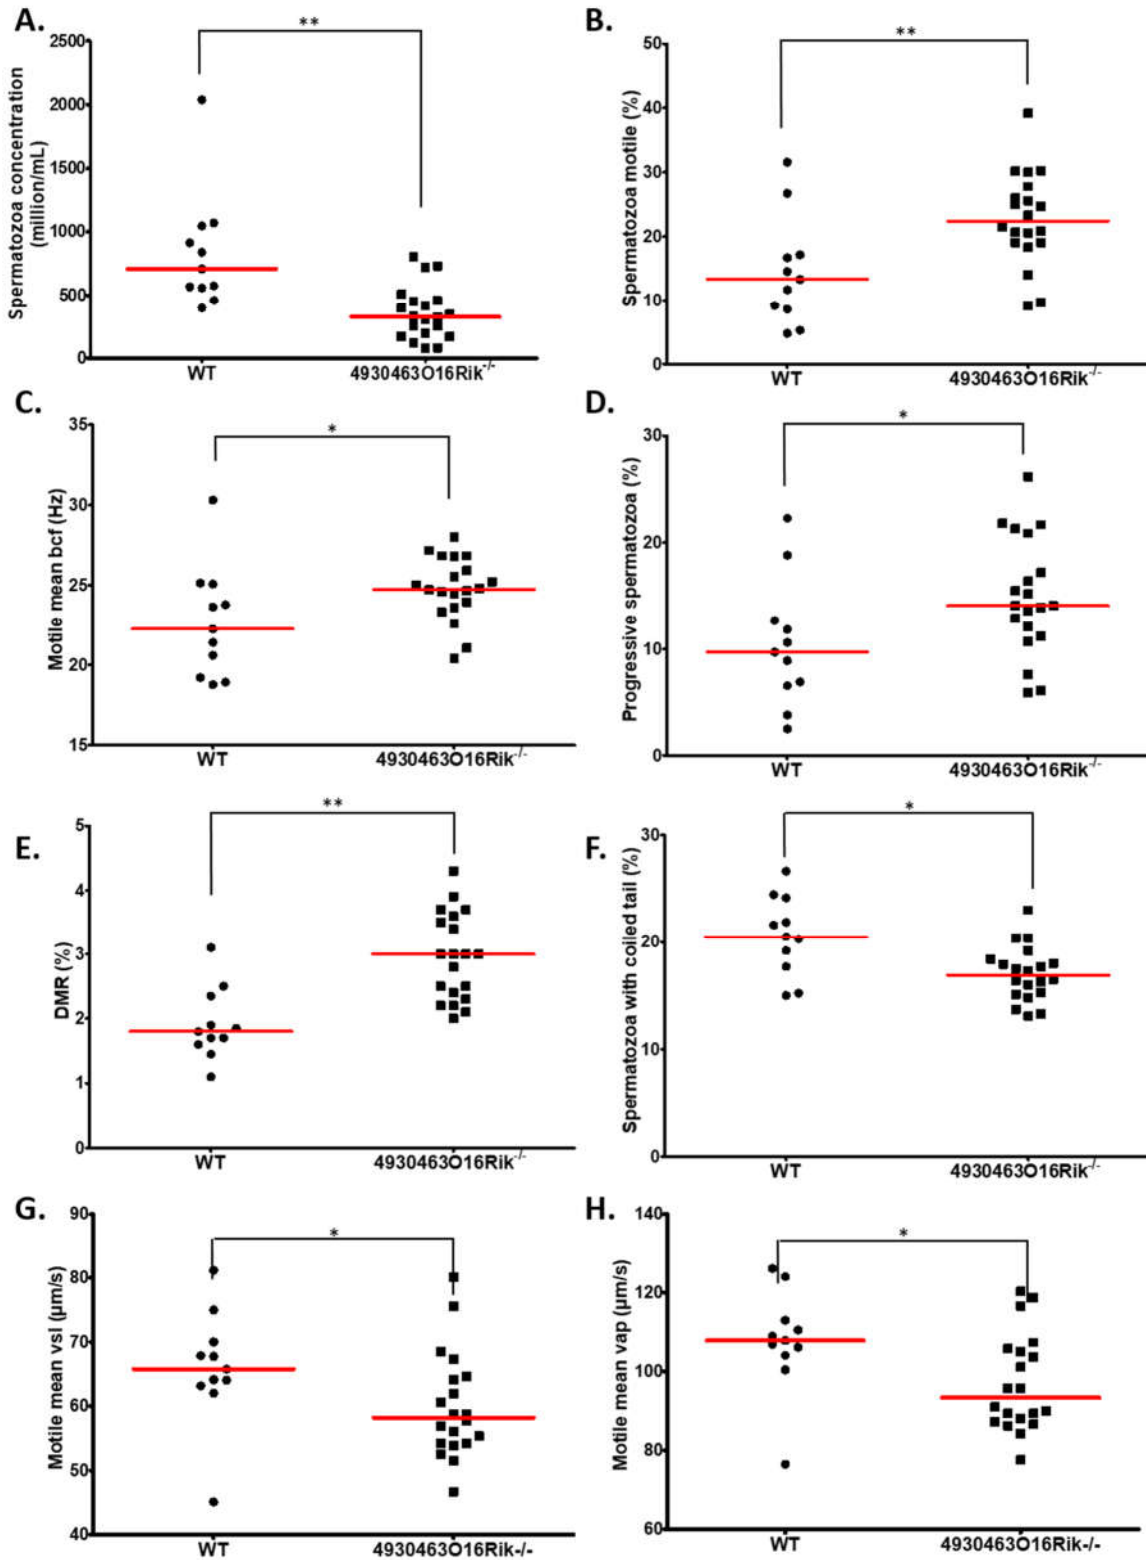

346

347 **Figure 7: Evaluation of sperm parameters.**

348 Comparison of sperm-specific parameters from WT (circle, n=11) and 4930463O16Rik<sup>-/-</sup> (square, n=20) mice.

349 Significantly affected sperm parameters were (A) spermatozoa concentration (10<sup>6</sup>/mL), (B) spermatozoa motility

350 (%), (C) motile mean bcf (beat cross frequency), (D) progressive spermatozoa (%), (E) DMR (distal midpiece reflex,  
351 abnormality of the sperm tail (%), (F) spermatozoa with coiled tail (%), (G) motile mean VSL ( $\mu\text{m/s}$ ) and (H) VAP  
352 ( $\mu\text{m/s}$ ). Statistical analyses were performed using the non-parametric Kruskal-Wallis test. \* =  $p\text{-val}<0.05$ , \*\* =  $p\text{-}$   
353  $\text{val}<0.01$ .

354

355 These results obtained using computer-aided sperm analysis (CASA) thus showed that several sperm  
356 parameters; namely concentration, motility, morphology and kinetics were impacted in  
357 *4930463O16Rik* lncRNA-deficient mice. Some of them might negatively impact fertility, such as the  
358 sperm concentration, the DMR, the percentage of coiled tail and the motile mean vsl, while others  
359 would tend to suggest increased fertility, such as the motile mean percentage and bcf, and the  
360 progressive spermatozoa. These observations might have explained the normal fertility of  
361 *4930463O16Rik* lncRNA-deficient mice.

362

### 363 **Normal male fertility despite *4930463O16Rik*<sup>-/-</sup> mouse testis transcriptome modified**

364 Transcriptomic RNA-seq analyses were performed in WT and *4930463O16Rik*<sup>-/-</sup> mouse testes at two  
365 developmental stages; i.e. at P16 and 18, as in the *Topaz1*<sup>-/-</sup> mouse line.

366 At P16, seven genes were differentially expressed (adjusted  $p\text{-value}<0.05$ ; absolute  $\text{Log}_2\text{FC}>1$ ),  
367 including *4930463O16Rik*, *1700092E16Rik* and *E230014E18Rik* (Supplementary Table 5). These latter  
368 two Riken cDNAs are in fact situated within the 3' transcribed RNA of *4930463O16Rik* (positioned in  
369 Figure 5C) and correspond to a unique locus. The transcriptional activity of this new locus stops  
370 towards the 3' end of the *cKap4* gene (cytoskeleton-associated protein 4 or Climp-63). This gene was  
371 down-regulated 1.7-fold in both knock-out lines (*Topaz1* and *4930463O16Rik*), which could suggest a  
372 newly discovered positive regulatory role for this lncRNA on the *cKap4* gene.

373 At P18, 258 genes were differentially expressed (199 down-regulated and 59 up-regulated using the  
374 same statistical parameters; Supplementary Table 5). Among them, 206 were protein-coding genes  
375 accounting for 79.8% of DEGs (Figure 8A). Thus, P18 DEGs highlighted a direct or indirect relationship

376 between the loss of the *4930463O16Rik* lncRNA and protein-coding genes. In addition, loss of this  
377 lncRNA also resulted in the deregulation of 37 (14.3%) other lncRNAs.  
378

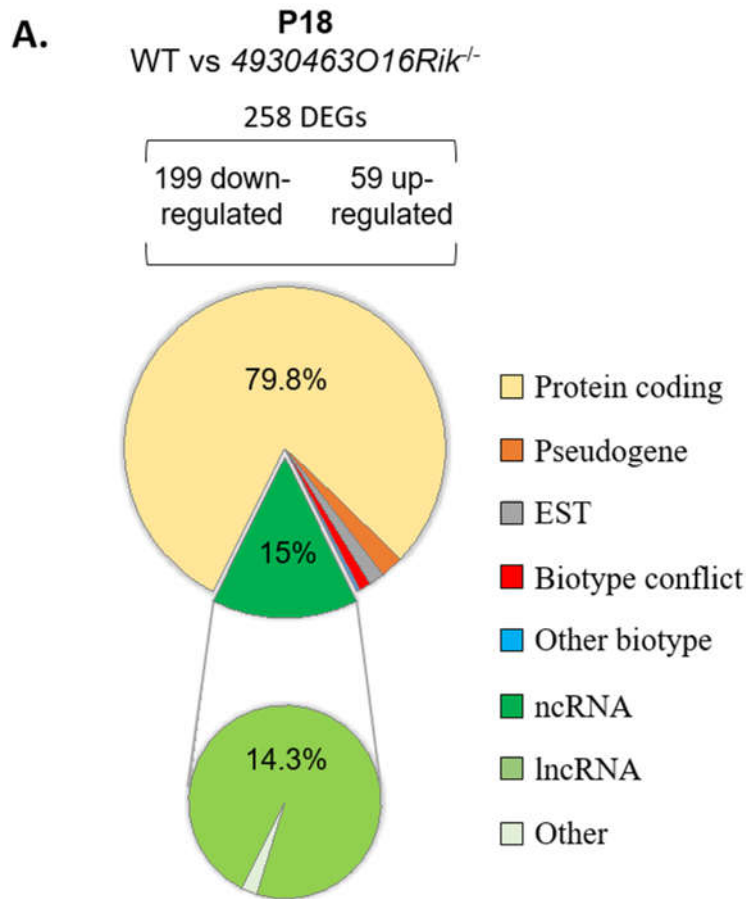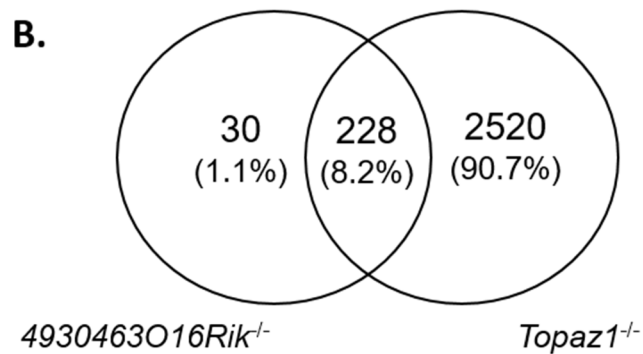

379

380 **Figure 8: Deregulated genes from *4930463O16Rik*<sup>-/-</sup> mouse testes.**

381 (A) Biotype of differentially expressed genes at P18 in *4930463O16Rik*<sup>-/-</sup> testes. Most of the deregulated genes  
382 are coding protein genes (adjusted  $p < 0.05$  and down-regulated  $FC < 2$  ( $\log_2 FC < -1$ ) or up-regulated  $FC > 2$   
383 ( $\log_2 FC > 1$ ). (B) Venn diagram showing the overlap of differentially expressed genes between *4930463O16Rik*<sup>-/-</sup>  
384 and *Topaz1*<sup>-/-</sup> mouse testes at 18 dpp.

385

386 The validation of several DEGs was performed by RT-qPCR using WT and *4930463O16Rik*<sup>-/-</sup> testicular  
387 RNAs at both developmental stages (P16 and P18) (Supplementary Figure 9). The qPCR results for the  
388 genes thus tested were consistent with those of RNA-seq.

389

390 The *4930463O16Rik*<sup>-/-</sup> DEGs were also analyzed using the DAVID database (Supplementary Table 6). At  
391 P18, six functional clusters had an enrichment score  $> 1.3$  (Huang et al., 2009a). As for *Topaz1*<sup>-/-</sup> mouse  
392 testes, they included the following GO terms: (i) for cellular components: cilium movement, ciliary  
393 part, axoneme, and (ii) for biological processes: microtubule-based process, regulation of cilium  
394 movement, spermatogenesis, male gamete generation, spermatid development and differentiation  
395 (Supplementary Table 6). An analysis that discriminated up-regulated from down-regulated genes only  
396 increased the value of the enrichment scores for the latter. The absence of TOPAZ1 protein or of  
397 *4930463O16Rik* lncRNA caused the same enrichment clusters in mutant testes despite different  
398 outcomes regarding the fertility of male mice. The other clusters from the DAVID analysis referred to  
399 the GO terms: cell surface, external side of membrane, defense or immune response and response to  
400 external stimulus. These clusters were only found in the DAVID analysis with up-regulated genes.

401 Therefore, the *4930463O16Rik* gene would appear to regulate genes related to spermatogenesis,  
402 microtubule or ciliary organization and the cytoskeleton in P18 testes. In the absence of this lncRNA,  
403 some genes involved in defense mechanisms or the immune response are also deregulated, suggesting  
404 stressful conditions. It should be noted that the majority (228/258 or 88%) of the DEGs from P18-  
405 *4930463O16Rik*<sup>-/-</sup> testes was in common with those deregulated in *Topaz1*<sup>-/-</sup> mice (Figure 8B). This led  
406 to similar results following ontological analyses of the DEGs of the two mutant lines. In the *Topaz1*<sup>-/-</sup>

407 testes, these 228 genes could be a consequence of the down-regulation of *4930463O16Rik* lncRNA.

408 On the other hand, these 228 DEGs alone do not explain meiotic arrest in the *Topaz1*<sup>-/-</sup> testes.

409

## 410 Discussion

411 *Topaz1* was initially reported as a germ-cell specific factor (Baillet et al., 2011) essential for meiotic  
412 progression and male fertility in mice (Luangpraseuth-Prosper et al., 2015). The suppression of *Topaz1*  
413 led to an arrest of meiosis progression at the diplotene-metaphase I transition associated with germ  
414 cell apoptosis. Moreover, an initial transcriptomic approach, based on DNA microarrays, enabled the  
415 observation of a large but not exhaustive repertoire of deregulated transcripts. Using this technology,  
416 10% of differentially-expressed probes were lncRNAs and presented deregulated expression in P20  
417 *Topaz1*<sup>-/-</sup> testes compared to WT.

418 During this study, we were able to show that the effects of the *Topaz1* gene being absent were visible  
419 on the mouse testicular transcriptome as early as 16 days *post-partum*, i.e. before the first meiotic  
420 division and the production of haploid germ cells. These effects were amplified at 18 days *post-partum*,  
421 just before or at the very start of the first haploid germ cells appearing. The molecular pathways  
422 involved in the suppression of TOPAZ1 form part of spermatogenesis and the establishment of the cell  
423 cytoskeleton. At these two stages, P16 and P18, about a quarter of the deregulated genes in testes  
424 were ncRNAs (mainly lncRNAs) some of which displayed almost no expression in *Topaz1*<sup>-/-</sup> testes.  
425 Suppressing one of them did not prevent the production of haploid spermatids and spermatozoa, but  
426 halved the murine sperm concentration. Furthermore, by deleting ~10 kb corresponding to this  
427 *4930463O16Rik* lincRNA, we showed that the transcriptional extinction was even longer,  
428 encompassing ~35 kb in total and two other genes (1700092E16Rik (unknown gene type according to  
429 Ensembl) and the lincRNA E230014E18Rik). Indeed, our transcriptional data suggested that these three  
430 annotated loci belong to a unique gene. Transcription of this lincRNA ended near the 3' region of the  
431 *cKap4* gene, known to be associated with the cytoskeleton (Vedrenne and Hauri, 2006). Remarkably,



432 *cKap4* expression was down-regulated 1.7 fold in both types of knockout mouse (*Topaz1*<sup>-/-</sup> and  
433 *4930463O16Rik*<sup>-/-</sup>), suggesting a previously unknown and positive regulatory role of *4930463O16Rik*  
434 on *cKap4*.

435

#### 436 ***Topaz1* ablation leads to chromosome misalignments at pro-metaphase I.**

437 Meiosis and its two cell divisions are well-orchestrated sequences of events controlled by different  
438 genes. Although these divisions have many similarities between males and females, meiosis is also sex-  
439 dimorphic. This particularly concerns timing, synchronization, the number of haploid gametes  
440 produced and the periods of meiotic arrest (reviewed by (Handel and Eppig, 1998)). In females, meiosis  
441 is initiated during fetal life and oocyte development is arrested at the end of prophase I; they remain  
442 in this arrested state until the onset of ovulatory cycles around puberty. The first division of meiosis  
443 then resumes and leads to the release of a first polar globule with the secondary oocyte. At  
444 metaphase II, the oocyte is blocked again. Release of the second polar globule leading to the formation  
445 of the female gamete only occurs at fertilization (Handel and Eppig, 1998). In males, meiosis is a  
446 continuous process during the post-natal period, just before puberty, and results in the formation of  
447 four male gametes from one spermatocyte. Despite these sex-dimorphic differences, the first  
448 reductional division of meiosis is highly conserved between species and between sexes in terms of  
449 morphology and genetic regulation. It has been hypothesized that the mechanisms regulating and  
450 controlling prophase I during mammalian meiosis, frequently named "checkpoints", are more stringent  
451 in males than in females. This has been demonstrated during the past 25 years by the use of a large  
452 number of mutant mouse models, mainly gene knockout mice (Morelli and Cohen, 2005; Handel and  
453 Schimenti, 2010; Su et al., 2011).

454 A major checkpoint in males is the synaptic checkpoint that controls zygotene-pachytene transition,  
455 highlighted in male mice lacking *Sycp3*, *Dmc1*, *Spo11*, *mei1*, *Msh4-5* or *OvoL1* genes (Pittman et al.,  
456 1998; Edelmann et al., 1999; Baudat et al., 2000; Kneitz et al., 2000; Romanienko and Camerini-Otero,  
457 2000; Yuan et al., 2000; Li et al., 2005; Reinholdt and Schimenti, 2005). In mutant females, this synaptic

458 checkpoint is less stringent. Indeed, female meiotic arrest may occur later, starting from the diplotene,  
459 as seen in *Dmc1*, *mei1*, *Msh4-5* knockout mice during the dictyate-resting phase of the oocyte,  
460 evidenced in *Spo11*. These female mice may even be fertile, as seen in *OvoL1* knockout mouse (Li et  
461 al., 2005). Other gene suppressions have highlighted a second meiotic checkpoint of metaphase I in  
462 males (such as those of *Mlh1-3*, or cyclin A1) due to a misalignment of chromosomes on the spindle  
463 (Liu et al., 1998; Eaker et al., 2002; Lipkin et al., 2002). Male mice devoid of the *Topaz1* gene may match  
464 these latter models. Indeed, *Topaz1*<sup>-/-</sup> spermatocytes do not progress to metaphase I and the  
465 chromosomes are not properly aligned on the metaphase plate. *Topaz1*<sup>-/-</sup> females are however fertile.

466

#### 467 **TOPAZ1 seems to be involved in the shape, structure and movements of cells.**

468 Absence of the *Topaz1* gene disturbs the transcriptome of murine testes as early as 16 days postnatal.  
469 Of the 205 DEGs at P16, 85 were specific to this stage of development compared to P18 (Figure 1A),  
470 such as *Ptgs1* (*Cox1*) a marker of peritubular cells (Rey-Ares et al., 2018), and *Krt18* a marker of Sertoli  
471 cell maturation (Tarulli et al., 2006). Moreover, different genes involved in the TGFβ pathway were  
472 also P16-DEGs, such as *Bmpr1b*, *Amh* and *Fstl3*. The latter, for example, was demonstrated to reduce  
473 the number of Sertoli cells in mouse testes and to limit their size (Oldknow et al., 2013). *Ptgds* (*L-Pgds*),  
474 which plays a role in the PGD2 molecular pathway during mammalian testicular organogenesis, is also  
475 deregulated (Moniot et al., 2009). All these genes, specifically deregulated at P16 due to the absence  
476 of *Topaz1*, thus appeared to participate in regulating cell communication. At P18, these genes were no  
477 longer differential but they could be replaced by genes belonging to the same gene families, such as  
478 the cadherin or keratin families.

479 Many of the 205 DEGs at P16 were involved in defense response pathways. For example, *Ifit3* and  
480 *Gbp3* are immune response genes in spermatocyte-derived GC-2spd(ts) cells (Kurihara et al., 2017).

481 Two days later, at P18, just before the prophase I-metaphase 1 transition, ten times more genes were  
482 deregulated. Among the 120 DEGs common to P16 and P18, there was at least one gene that might be  
483 involved in meiosis such as *Aym1*, an activator of yeast meiotic promoters 1. The absence of *Topaz1*

484 led to a lack of the testicular expression of *Aym1*. This gene is germ cell-specific (Malcov et al., 2004).  
485 In male mice, *Aym1* is expressed from 10 dpp in early meiotic spermatocytes. The small murine AYM1  
486 protein (44 amino acids) is immunolocalized in the nucleus of primary spermatocytes, mainly late  
487 pachytene and diplotene, suggesting a nuclear role for AYM1 in germ cells during the first meiotic  
488 division (Malcov et al., 2004).

489 At P18, the testicular transcriptome of *Topaz1*<sup>-/-</sup> mice was largely disturbed when compared to WT  
490 animals, and most DEGs were down-regulated (Figure 1F), suggesting that TOPAZ1 promotes gene  
491 expression in normal mice. As TOPAZ1 is predicted to be an RNA-binding protein, it is tempting to  
492 speculate that its absence disorganized ribonucleic-protein complexes, including their instabilities and  
493 degradation. This could partly explain why 90% of DEGs were down-regulated at P18 and included a  
494 large proportion of lincRNAs. These down-regulated genes at P18 concerned microtubule-based  
495 movement and microtubule-based processes, and cellular components relative to motile cilium, ciliary  
496 part, sperm flagellum and axoneme. In addition, DAVID analysis revealed GO terms such as centriole,  
497 microtubule and spermatogenesis. All these terms relate to elements of the cytoskeleton that are  
498 indispensable for mitotic and/or meiotic divisions, motility and differentiation and are also widely  
499 involved in spermiogenesis, as might be expected with this latter GO term because most DEGS are  
500 testis-specific. The centriole is a widely conserved organelle in most organisms. A pair of centrioles is  
501 located at the heart of the centrosome, and the whole is grouped together as the main microtubule-  
502 organizing center (MTOC). During our study, staining of the meiotic spindle and centrosomes revealed  
503 a disturbance of these pathways (Figure 2 and Supplementary Figure 2). Such abnormal metaphase-  
504 like chromosomes were arranged in rosettes rather than being neatly aligned at the cell equator, and  
505 hemispindles centered in the spermatocytes had previously been observed. For example, aberrant  
506 prometaphase-like cells were observed in *Mlh1*- or *Meioc*-deficient testes (*Meioc* is down-regulated  
507 1.51-fold in P18 in *Topaz1*<sup>-/-</sup> testes) (Eaker et al., 2002; Abby et al., 2016). These mutant mice have  
508 been described as displaying an arrest of male meiosis, and testes devoid of haploid germ cells leading  
509 to male sterility like mice lacking the *Topaz1* gene. In *Topaz1*<sup>-/-</sup> testes, *Mlh1* is not a DEG.

510

511 During spermatogenesis, the dysregulation of centrosome proteins may affect meiotic division and  
512 genome stability. The centriole proteins CEP126, CEP128, CEP63 were down-regulated (FC from 2.1 to  
513 2.7 compared to WT) at P18 in *Topaz1*<sup>-/-</sup> testes. CEP126 is localized with  $\gamma$ -tubulin on the centriole  
514 during the mitosis of hTERT-RPE-1 (human telomerase-immortalized retinal pigmented epithelial cells)  
515 (Bonavita et al., 2014) but has never been studied in germ cells during meiosis. CEP128 was localized  
516 to the mother centriole and required to regulate ciliary signaling in zebrafish (Mönnich et al., 2018).  
517 *Cep128* deletion decreased the stability of centriolar microtubules in F9 cells (epithelial cells from  
518 testicular teratoma of mouse embryo) (Kashihara et al., 2019). Centriole separation normally occurs at  
519 the end of prophase I or in early metaphase I, and CEP63 is associated with the mother centrioles. The  
520 mouse model devoid of *Cep63* leads to male infertility (Marjanović et al., 2015), and in spermatocytes  
521 from these mice, the centriole duplication was impaired. Finally, our ontology analysis of *Topaz1*<sup>-/-</sup> P18-  
522 DEGs revealed significant enrichment scores for the several clusters relative to the final structure of  
523 spermatozoa such as tetratricopeptide repeat (TPR) and dynein heavy chain (DNAH1) clusters. Dynein  
524 chains are macromolecular complexes connecting central or doublet pairs of microtubules together to  
525 form the flagellar axoneme, the motility apparatus of spermatozoa (ref in (Miyata et al., 2020a)).  
526 Dynein proteins have also been identified as being involved in the microtubule-based intracellular  
527 transport of vesicles, and in both mitosis and meiosis (Mountain and Compton, 2000).  
528 The TPR or PPR (pentatricopeptide repeat) domains consist of several 34 or 36 amino acid repeats that  
529 make up  $\alpha$ -hairpin repeat units, respectively (D'Andrea and Regan, 2003). The functions of TPR or  
530 PPR proteins were firstly documented in plants and are involved in RNA editing (D'Andrea and Regan,  
531 2003; Schmitz-Linneweber and Small, 2008). In the mouse, *Cfap70*, a tetratricopeptide repeat-  
532 containing gene, was shown to be expressed in the testes (Shamoto et al., 2018), or as *Spag1* in late-  
533 pachytene spermatocytes or round spermatids (Takaishi and Huh, 1999). Moreover, *Ttc21a* knockout  
534 mice have displayed sperm structural defects of the flagella and the connecting piece. In humans,  
535 *Ttc21a* has been associated with asthenoteratospermia in the Chinese population (Liu et al., 2019).

536 Numerous components of the intraflagellar transport (IFT) complex contain TPR. Several genes coding  
537 for such tetratricopeptide repeat-containing proteins are down-regulated in P18 testes devoid of  
538 *Topaz1*, such as *Cfap70*, *Spag1*, *Tct21a* and *Ift140*. Based on TPRpred (Karpenahalli et al., 2007) that  
539 predicted TPR- or PPR-containing proteins, the TOPAZ1 protein was predicted to contain such domains;  
540 seven in mice (p-val= 7.5E-08, probability of being PPR= 46.80%) and ten in humans (p-val= 3.4E-09,  
541 probability of being PPR = 88.76%).

542 A recent study of single cell-RNA-seq from all types of homogeneous spermatogenic cells identified  
543 clusters of cells at similar developmental stages (Chen et al., 2018a). This study shown that most of the  
544 genes involved in spermiogenesis start being expressed from the early pachytene stage. This is  
545 consistent with our RNA-seq results. Taken together, these data indicate that the absence of *Topaz1*  
546 down-regulated a significant number of cytoskeleton-related genes, leading to a defect in formation  
547 of the meiotic spindle and to a deficient duplication and/or migration of centrosomes as early as 18  
548 days post-natal. *Topaz1* could lead to impaired chromosome dynamics via the activation of  
549 cytoskeleton genes, thus revealing the essential role of the centrosome in promoting division and then  
550 fertility. TOPAZ1 may act via its TPR domains.

551

### 552 ***Topaz1* ablation deregulates a high proportion of lncRNAs**

553 DEGs between *Topaz1*<sup>-/-</sup> and WT mouse testes also revealed a high proportion of deregulated lncRNAs.  
554 We showed that three lincRNAs, whose expression was almost abolished as early as P16 in *Topaz1*-  
555 *deficient* mouse testes, were testis- and germ cell-specific. We showed that these genes are expressed  
556 in spermatocytes and round spermatids, suggesting a role in spermatogenesis. Their functions are still  
557 unknown.

558 Several investigations have revealed that the teste allow the expression of many lncRNAs (Necsulea et  
559 al., 2014). In mammals, the testis is the organ with the highest transcription rate (Soumillon et al.,  
560 2013). However, during the long stage of prophase I, these levels of transcription are not consistent.  
561 Indeed, transcription is markedly reduced or even abolished in the entire nucleus of spermatocytes

562 during the early stages of prophase I. This is accompanied in particular by the nuclear processes of  
563 DNA division, the pairing of homologous chromosomes and telomeric rearrangements (Bolcun-Filas  
564 and Schimenti, 2012; Baudat et al., 2013; Shibuya and Watanabe, 2014), and also by the appearance  
565 of MSCI (meiotic sex chromosome inactivation) markers (Page et al., 2012). These processes are  
566 supported by epigenetic changes such as histone modifications and the recruitment of specific histone  
567 variants (references in Page et al., 2012). Transcription then takes up an important role in late-  
568 pachytene to diplotene spermatocytes (Monesi, 1964). The aforementioned scRNA-seq study of  
569 individual spermatogenic cells showed that almost 80% of annotated autosomal lncRNAs were  
570 expressed in spermatogenic cells, mainly in mid-pachytene- to metaphase I-spermatocytes but also  
571 in round spermatids (Chen et al., 2018a). The three lncRNAs investigated during our study  
572 (*4930463O16Rik*, *Gm21269* and *4921513H07Rik*) were also expressed at these developmental stages  
573 in mouse testes (Chen et al., 2018b; Li et al., 2021). In the latter study (Li et al., 2021), the authors  
574 identified certain male germline-associated lncRNAs as being potentially important to  
575 spermatogenesis *in vivo*, based on several computational and experimental data sets; these lncRNAs  
576 included *Gm21269* and *4921513H07Rik*. The localization of lncRNAs in cells may be indicative of their  
577 potential function (Chen, 2016). *4930463O16Rik* is expressed in the nucleus of spermatocytes. As  
578 mentioned above, *4930463O16Rik* may play a positive role in the expression of *cKap4* at the  
579 neighboring locus. Some nuclear lncRNA are involved in regulating transcription with a *cis*-regulatory  
580 role, such as *Malat1* or *Air* (Sleutels et al., 2002; Zhang et al., 2012) on a nearby gene. Other nuclear  
581 lncRNAs act in *trans* and regulate gene transcription at another locus, such as *HOTAIR* (Chu et al.,  
582 2011). In addition, some cytoplasmic lncRNA have been shown to play a role in miRNA competition,  
583 acting as miRNA sponges or decoys (such as *linc-MD1* in human myoblasts (Cesana et al., 2011)).  
584 *Gm21269* is localized in the cytoplasm and nuclei of spermatocytes during meiosis. Both cytoplasmic  
585 and nuclear lncRNAs may act as a molecular scaffold for the assembly of functional protein complexes,  
586 such as *HOTAIR* or *Dali* (Tsai et al., 2010; Chalei et al., 2014), regulating protein localization and/or  
587 direct protein degradation, or acting as an miRNA precursor (Cai and Cullen, 2007). Finally, multiple

588 other roles can be observed for lncRNAs. For example, the *Dali* lncRNA locally regulates its neighboring  
589 *Pou3f3* gene, acts as a molecular scaffold for POU3F3 protein and interacts with DNMT1 in regulating  
590 the DNA methylation status of CpG island-associated promoters in *trans* during neural differentiation  
591 (Chalei et al., 2014).

592

### 593 **The deletion of one lncRNA alters sperm parameters without affecting fertility**

594 To decipher the biological function of an lncRNA affected by *Topaz1* invalidation, a mouse model  
595 devoid of *4930463O16Rik* was produced, with the same genetic background as *Topaz1*<sup>-/-</sup> mice. This  
596 knockout mouse model did not exhibit meiosis disruption and the fertility of these mutant mice  
597 remained intact under standard laboratory conditions. Using a similar approach, *Sox30* is a testis-  
598 specific factor that is essential to obtain haploid germ cells during spermatogenesis (Bai et al., 2018).  
599 SOX30 regulates *Dnajb8* expression, but the deletion of *Dnajb8* is not essential for spermatogenesis  
600 and male fertility (Wang et al., 2020).

601 Several mutant mice deprived of testis-specific genes proved to be fertile, although no role has been  
602 established for these genes during spermatogenesis. This was noted in particular for the *Flacc1*,  
603 *Trim69*, *Tex55*, *4930524B15Rik* genes (Chotiner et al., 2020; He et al., 2020; Khan et al., 2020; Jamin et  
604 al., 2021) or for highly testis-enriched genes such as *Kdm4d*, *Tex37*, *Ccdc73* or *Prss55* (Iwamori et al.,  
605 2011; Khan et al., 2018). Some of them were down-regulated genes in *Topaz1*<sup>-/-</sup> or *4930463O16Rik*<sup>-/-</sup>  
606 testes (*Trim69* in *Topaz1*<sup>-/-</sup> FC = 3.99 and in *4930463O16Rik*<sup>-/-</sup> FC = 2.27; *Kdm4d* in *Topaz1*<sup>-/-</sup> FC = 2.70  
607 and in *4930463O16Rik*<sup>-/-</sup> FC = 1.83; *Ccdc73* in *Topaz1*<sup>-/-</sup> FC = 1.46). Some laboratories have recently also  
608 generated several dozen testis-enriched knockout mouse lines using the CRISPR/Cas9 system and  
609 shown that all these genes are individually dispensable in terms of male fertility in mice (Miyata et al.,  
610 2016; Lu et al., 2019).

611 The abundant expression of lncRNAs during spermatogenesis has also prompted other laboratories to  
612 produce knockout mouse models of testis-specific lncRNAs. This was the case for *1700121C10Rik* or  
613 *lncRNA5512* lncRNAs where mutant mice were also fertile without variations in their sperm

614 parameters (Li et al., 2020; Zhu et al., 2020). One working hypothesis might be that some lncRNAs may  
615 regulate subsets of functional spermatogenic-gene expression, in line with their nuclear localization,  
616 by binding to their regulatory genomic region.

617 Nevertheless, in our *4930463O16Rik*-knockout mouse model, several sperm parameters were altered,  
618 including reduction in epididymal sperm concentrations (by more than half) and sperm motility. In  
619 *Tslrn1* knockout mice (testis-specific long non-coding RNA 1) the males were fertile and displayed  
620 significantly lower sperm levels (-20%) but no reduction in litter size, or major defects in testis histology  
621 or variations in sperm motility (Wichman et al., 2017). In *Kif9*-mutant male mice, no testes  
622 abnormalities were found (Miyata et al., 2020b). They were sub-fertile due to impaired sperm motility:  
623 the VSL and VAP velocity parameters were reduced, as in *4930463O16Rik* knockout mice. The authors  
624 concluded that *Kif9* mutant mice were still fertile and this was probably due to variations in the motility  
625 of individual spermatozoa; those with good motility could still fertilize oocytes. The same conclusion  
626 may apply to *4930463O16Rik*<sup>-/-</sup> mice.

627 The suppression of a gene – in this case *4930463O16Rik* lincRNA – whose expression is markedly down-  
628 regulated in the testes of sterile *Topaz1*<sup>-/-</sup> mice (FC = 40), has no effect on spermatogenesis. Our data  
629 suggest that the expression of *4930463O16Rik* is not essential for meiotic division but adds to the  
630 terminal differentiation of male germ cells.

631

632 Various genes, either testis-specific or highly expressed in the testes, exert no effect on reproduction  
633 when deleted independently (Miyata et al., 2016; Li et al., 2020). Given the large number of lncRNAs  
634 expressed in meiotic testes, one explanation may be that the function of *4930463O16Rik* is partly  
635 redundant with that of other testicular lncRNAs.

636 However, outside the laboratory, in wild reproductive life, one might imagine that biological functions  
637 may differ under more natural conditions due to stress and reproductive competition. This has been  
638 shown in particular for *Pkdrej*-deficient male mice which are fertile, whereas the *Pkdrej* gene



639 (polycystin family receptor for egg jelly), is important to postcopulatory reproductive selection (Sutton  
640 et al., 2008; Miyata et al., 2016).

641

642 The absence of a specific anti-TOPAZ1 antibody did not enable us to further advance in our  
643 understanding of its function during murine spermatogenesis. The creation of a Flag-tagged *Topaz1*  
644 knockin mouse model will allow us to gain further insights, and Rip-seq experiments will enable the  
645 determination of RNA-TOPAZ1 complexes during spermatogenesis.

646 In summary, *Topaz1* is a gene that is essential for fertility in male mice. Its absence leads to meiotic  
647 arrest before the first division; germ cells display a centered monopolar spindle and a misarrangement  
648 of chromosomes. In addition, *Topaz1* stabilizes the expression of many lncRNAs. The suppression of  
649 one of them is not essential to mouse fertility but it is necessary during the terminal differentiation of  
650 male germ cells to achieve optimal function.

651

## 652 **Materials and methods**

### 653 **Ethics statement**

654 All animal experiments were performed in strict accordance with the guidelines of the Code for  
655 Methods and Welfare Considerations in Behavioral Research with Animals (Directive 2016/63/UE). All  
656 experiments were approved by the INRAE Ethical Committee for Animal Experimentation covering  
657 Jouy-en-Josas (COMETHEA, no. 18-12) and authorized by the French Ministry for Higher Education,  
658 Research and Innovation (No. 815-2015073014516635).

659

### 660 **Mice**

661 The generation and preliminary analysis of *Topaz1*-null transgenic mouse line has been described  
662 previously (Luangpraseuth-Prosper *et al.* 2015).

663 Generation of the *4630493O16Rik*-null transgenic mouse line was achieved using CrispR-Cas9 genome  
664 editing technology. The RNA mix comprised an mRNA encoding for SpCas9-HF1 nuclease and the four  
665 sgRNA (Supplementary Table 4) targeting the *4930463o16Rik* gene (NC\_000076: 84324157-  
666 84333540). These sgRNAs were chosen according to CRISPOR software (<http://crispor.tefor.net/>) in  
667 order to remove the four exons and introns of the *4930463o16Rik* gene. Cas9-encoding mRNA and the  
668 four sgRNAs were injected at a rate of 100 ng/μL each into one cell fertilized C57Bl/6N mouse eggs  
669 (Henao-Mejia et al., 2016).

670 The surviving injected eggs were transferred into pseudo-pregnant recipient mice. Tail-DNA analysis  
671 of the resulting live pups was performed using PCR with genotyping oligonucleotides (Supplementary  
672 Table 4) and the Takara Ex Taq® DNA Polymerase kit. The PCR conditions were 94 °C 30s, 60 °C 30s and  
673 72 °C 30s, with 35 amplification cycles.

674 Two transgenic founder mice were then crossed with wild-type C57Bl/6N mice to establish transgenic  
675 lines.

676 F1 heterozygote mice were crossed together in each line to obtain F2 homozygote mice, thus  
677 establishing the *4630493O16Rik*<sup>-/-</sup> mouse lines. Both mouse lines were fertile and the number of pups  
678 was equivalent, so we worked with one mouse line.

679 All mice were fed *ad libitum* and were housed at a temperature of 25°C under a 12h/12h light/dark  
680 cycle at the UE0907 unit (INRAE, Jouy-en-Josas, France). The animals were placed in an enriched  
681 environment in order to improve their receptiveness while respecting the 3R. All mice were then  
682 sacrificed by cervical dislocation. Tissues at different developmental stages were dissected and fixed  
683 as indicated below, or flash frozen immediately in liquid nitrogen before storage at -80°C. The frozen  
684 tissues were used for the molecular biology experiments described below.

685

## 686 **Histological and immunohistochemical analyses**

687 For histological studies, fresh tissues from 8-week-old mice were fixed in 4% paraformaldehyde  
688 (Electron Microscopy Sciences reference 50-980-495) in phosphate buffer saline (PBS) at 4°C. After

689 rinsing the tissues in PBS, they were stored in 70% ethanol at 4°C. Paraffin inclusions were then  
690 performed using a Citadel automat (Thermo Scientific Shandon Citadel 1000) according to a standard  
691 protocol. Tissues included in paraffin blocks were sectioned at 4µm and organized on Superfrost Plus  
692 Slides (reference J1800AMNZ). Once dry, the slides were stored at 4°C. On the day of the experiment,  
693 these slides of sectioned tissues were deparaffinized and rehydrated in successive baths of xylene and  
694 ethanol at room temperature. For histology, testes sections were stained with hematoxylin and eosin  
695 (HE) by the @Bridge platform (INRAE, Jouy-en-Josas) using an automatic Varistain Slide Stainer  
696 (Thermo Fisher Scientific). Periodic acid-Schiff staining (PAS) was used to determine seminiferous  
697 epithelium stages.

698 *In situ* hybridization experiments were performed using the RNAscope® system (ACB, Bio-Techne SAS,  
699 Rennes, France). Briefly, probes (around 1000 nt long) for *Topaz1* (NM\_001199736.1), *4930463o16Rik*  
700 (NR\_108059.1), *Gm21269* (NR\_102375.1) and *4921513H07Rik* (NR\_153846.1) were designed by ACB  
701 and referenced with the catalog numbers 402321, 431411, 549421 and 549441, respectively. Negative  
702 and positive controls were ordered from ACD with *Bacillus subtilis* dihydrodipicolinate reductase  
703 (dapB) and *Homo sapiens* ubiquitin C (Hs-UBC), respectively. Hybridization was performed according  
704 to the manufacturer's instructions using a labelling kit (RNAscope® 2.5HD assay-brown). Brown  
705 labelling slides were counterstained according to a PAS staining protocol and then observed for visible  
706 signals. Hybridization was considered to be positive when at least one dot was observed in a cell.  
707 Stained sections were scanned using a 3DHISTECH panoramic scanner at the @Bridge platform (INRAE,  
708 Jouy-en-Josas) and analyzed with Case Viewer software (3DHISTECH). We also used the RNAscope®  
709 2.5HD assay-red kit in combination with immunofluorescence in order to achieve the simultaneous  
710 visualization of RNA and protein on the same slide. The *ISH* protocol was thus stopped by immersion  
711 in water before hematoxylin counterstaining. Instead, the slides were washed in PBS at room  
712 temperature. The Mouse on mouse (M.O.M.) kit (BMK-2202, Vector laboratories) was used and slides  
713 were incubated for one hour in Blocking Reagent, 5 minutes in Working solution and 2 hours with a  
714 primary antibody: DDX4 (ab13840, Abcam) or γH2AX(Ser139) (Merck), diluted at 1:200 in Blocking

715 Reagent. Detection was ensured using secondary antibody conjugated to DyLight 488 (green, KPL).  
716 Diluted DAPI (1:1000 in PBS) was then applied to the slides for eight minutes. The slides were then  
717 mounted with Vectashield Hard Set Mounting Medium for fluorescence H-1400 and images were  
718 captured at the MIMA2 platform (<https://www6.jouy.inrae.fr/mima2/>,  
719 <https://doi.org/10.15454/1.5572348210007727E12>) using an inverted ZEISS AxioObserver Z1  
720 microscope equipped with an ApoTome slider, a Colibri light source and AxioCam MRm camera. Images  
721 were analyzed using Axiovision software 4.8.2 (Carl Zeiss, Germany).

722

### 723 **Total RNA extraction and Quantitative RT-PCR (RT-qPCR)**

724 Total RNAs from post-natal mouse testes or other organs were isolated using Trizol reagent. The RNAs  
725 were purified using the RNeasy Mini kit (Qiagen) following the manufacturer's instructions and then  
726 DNase-treated (Qiagen). The quantification of total RNAs was achieved with a Qbit® Fluorometric  
727 Quantitation. Maxima First-Strand cDNA Synthesis Kit (Thermo Scientific) was used to reverse  
728 transcript RNA into cDNA. The Step One system with Fast SYBR™ Green Master Mix (Applied  
729 Biosystems, ThermoFisher France) was used for qPCR, which was performed in duplicate for all tested  
730 genes and the results were normalized with qBase+ software (Biogazelle) (Hellemans et al., 2007).  
731 Gapdh, Ywahz and Mapk1 were used as the reference genes. For each experiment, median values were  
732 plotted using GraphPad Prism, and statistical analyses were performed with Kruskal-Wallis tests under  
733 R software (Rcmdr package (p-value<0.05)). The primer sequences used for RT-qPCR are shown in  
734 Supplementary Table 4.

735

### 736 **RNA-sequencing**

737 Total RNA quality was verified on an Agilent 2100 Bioanalyser (Matriks, Norway) and samples with a  
738 RIN>9 were made available for RNA-sequencing. This work benefited from the facilities and expertise  
739 of the I2BC High-throughput Sequencing Platform (Gif-sur-Yvette, Université Paris-Saclay, France) for

740 oriented library preparation (Illumina Truseq RNA Sample Preparation Kit) and sequencing (Paired-end  
741 75 bp; NextSeq). More than 38 million 75 bp paired-end reads per sample were generated.

742

### 743 **Transcriptomic analysis**

744 Sequence libraries were aligned with the Ensembl 95 genome using TopHat (Trapnell et al., 2009), and  
745 gene table counts were obtained by applying featureCounts to these alignments (Liao et al., 2014).

746 Data normalization and single-gene level analyses of differential expression were performed using  
747 DESeq2 (Love et al., 2014). Some samples were sequenced several months apart. A batch effect was

748 observed after computation of the hierarchical clustering of samples. In order to take this effect into  
749 account, we introduced the batch number into the DESeq2 model, as well as the study conditions.

750 Differences were considered to be significant for Benjamini-Hochberg adjusted p-values <0.05, and  
751 absolute fold changes >2 (absolute Log<sub>2</sub>FC>1) (Benjamini and Hochberg, 1995). Raw RNA-seq data

752 were deposited via the SRA Submission portal (<https://submit.ncbi.nlm.nih.gov/subs/sra/>), BioProject  
753 ID PRJNA698440.

754

### 755 **Biotype determination of DEGs**

756 Data available on the NCBI, MGI (<http://www.informatics.jax.org>) and Ensembl  
757 (<https://www.ensembl.org/>) websites were used simultaneously to determine the DEG biotypes. For

758 this purpose, information on the mouse genome was obtained by ftp from NCBI  
759 ([ftp://ftp.ncbi.nih.gov/gene/DATA/GENE\\_INFO/Mammalia/Mus\\_musculus.gene\\_info.gz](ftp://ftp.ncbi.nih.gov/gene/DATA/GENE_INFO/Mammalia/Mus_musculus.gene_info.gz)); the

760 annotation BioMart file from Ensembl (<http://www.ensembl.org/biomart/martview>; Ensembl genes  
761 95, Mouse genes GRCm28.p6) and feature types from MGI (<http://www.informatics.jax.org/marker/>;

762 with the protein coding gene, non-coding RNA gene, unclassified gene and pseudogenic region). Only  
763 data corresponding to the DEGs were conserved. The files from these three databases were therefore

764 cross-referenced to determine DEG biotypes. When the biotype of a gene differed between databases,  
765 the annotation was then listed as genes with a "biotype conflict".

766

## 767 **Gene ontology enrichment**

768 The mouse DEGS thus identified were analyzed through Gene Ontology (GO) and Kyoto Encyclopedia  
769 of Genes and Genomes (KEGG) pathway membership with Database performed using the DAVID  
770 Bioinformatic Database 6.8 (<https://david.ncifcrf.gov/>). These analyses and pathways were considered  
771 to be significant for a Benjamini-corrected enrichment p-value of less than 0.05. The Mouse Atlas  
772 Genome of differentially expressed genes extracted from this study was performed via the Enrichr  
773 website (<https://maayanlab.cloud/Enrichr/>).

774

## 775 **Sperm analysis**

776 Evaluations of the concentrations and motility of sperm in WT and *4930463O16Rik<sup>-/-</sup>* 8-week-old mice  
777 were performed using the IVOS II Computer Assisted Sperm Analysis (CASA) system (Hamilton Thorne,  
778 Beverly, MA, USA). The two fresh cauda epididymes from each individual were removed and plunged  
779 into 200  $\mu$ L TCF buffer (Tris, citrate and fructose buffer) where they were chopped up with small  
780 scissors. For sperm release, the samples were incubated for 10 minutes at 37°C. A 4  $\mu$ l aliquot was  
781 placed in a standardized four-chamber Leja counting slide (Leja Products B.V., Nieuw-Venep,  
782 Netherlands). Ten microscope fields were analyzed using the predetermined starting position within  
783 each chamber with an automated stage. Statistical analyses were performed using the mean of the 10  
784 analyzed fields containing at least 300 cells. The IVOS settings chosen were those defined for mouse  
785 sperm cell analysis (by Hamilton Thorne). The principal parameters were fixed as follows: 45 frames  
786 were captured at 60 Hz; for cell detection, the camera considered a signal as a spermatozoon when  
787 the elongation percentage was between 70 (maximum) and 2 (minimum); the minimal brightness of  
788 the head at 186, and the minimum and maximum size of the head at 7 and 100  $\mu$ m<sup>2</sup>, respectively. The  
789 kinematic thresholds applied were: cell travel max at 10 $\mu$ m, progressive STR at 45%, progressive VAP  
790 at 45 $\mu$ m/s, slow VAP at 20 $\mu$ m/s, slow VSL at 30 $\mu$ m/s, static VAP at 4 $\mu$ m/S and static VSL at 1 $\mu$ m/s. The  
791 full settings used are listed in Supplementary Table 7. The CASA parameters thus recorded included

792 the average path velocity (VAP in  $\mu\text{m/s}$ ), straight line velocity (VSL in  $\mu\text{m/s}$ ), curvilinear velocity (VCL in  
793  $\mu\text{m/s}$ ), amplitude of lateral head displacement (ALH in  $\mu\text{m}$ ), motility (percentage), and sperm  
794 concentration ( $\cdot 10^6/\text{mL}$ ). Slow cells were recorded as static. Median and interquartile ranges were  
795 plotted with GraphPad. To compare the sperm parameters between WT and *4930463O16Rik*<sup>-/-</sup> mice,  
796 statistical analyses were performed using the Kruskal-Wallis non-parametric test.

797

## 798 **Acknowledgments**

799 Our warmest thanks go to Jean-Luc Vilotte for allowing lncRNA deletion to take place in his laboratory,  
800 and also for proofreading this manuscript. We would like to thank the TACGENE facility at U1154-  
801 UMR7196, MNHN, Paris, and especially Anne De Cian and Jean-Paul Concordet, for the synthesis of  
802 gRNAs and Cas9 mRNA. We are grateful to all members of our mouse experimental unit (IERP, INRA,  
803 Jouy en Josas, France). We thank the @Bridge platform for use of the Agilent Bioanalyzer and for  
804 histology facilities (UMR 1313 GABI, Jouy-en-Josas, France), and particularly Marthe Vilotte for HE  
805 staining. We also thank the MIMA2 platform for providing access to the virtual slide scanner  
806 (Panoramic SCAN, 3DHISTECH). Finally, we are grateful to all members of the "Gonad Differentiation  
807 and its Disturbances" team for our scientific and technical discussions on Monday mornings, either in  
808 person or by videoconference. Vicky Hawken was responsible for the English language editing of this  
809 manuscript.

810

## 811 **References**

- 812 Abby, E., Tourpin, S., Ribeiro, J., Daniel, K., Messiaen, S., Moison, D., et al. (2016). Implementation of  
813 meiosis prophase I programme requires a conserved retinoid-independent stabilizer of  
814 meiotic transcripts. *Nat Commun* 7, 10324. doi:10.1038/ncomms10324.
- 815 Anguera, M. C., Ma, W., Clift, D., Namekawa, S., Kelleher, R. J., and Lee, J. T. (2011). Tsx produces a  
816 long noncoding RNA and has general functions in the germline, stem cells, and brain. *PLoS*  
817 *Genet* 7, e1002248. doi:10.1371/journal.pgen.1002248.

- 818 Arun, G., Akhade, V. S., Donakonda, S., and Rao, M. R. S. (2012). mrhl RNA, a long noncoding RNA,  
819 negatively regulates Wnt signaling through its protein partner Ddx5/p68 in mouse  
820 spermatogonial cells. *Mol Cell Biol* 32, 3140–3152. doi:10.1128/MCB.00006-12.
- 821 Bai, S., Fu, K., Yin, H., Cui, Y., Yue, Q., Li, W., et al. (2018). Sox30 initiates transcription of haploid  
822 genes during late meiosis and spermiogenesis in mouse testes. *Development* 145.  
823 doi:10.1242/dev.164855.
- 824 Baillet, A., Le Bouffant, R., Volff, J. N., Luangpraseuth, A., Poumerol, E., Thépot, D., et al. (2011).  
825 TOPAZ1, a novel germ cell-specific expressed gene conserved during evolution across  
826 vertebrates. *PLoS One* 6, e26950. doi:10.1371/journal.pone.0026950.
- 827 Baudat, F., Imai, Y., and de Massy, B. (2013). Meiotic recombination in mammals: localization and  
828 regulation. *Nat Rev Genet* 14, 794–806. doi:10.1038/nrg3573.
- 829 Baudat, F., Manova, K., Yuen, J. P., Jasin, M., and Keeney, S. (2000). Chromosome synapsis defects  
830 and sexually dimorphic meiotic progression in mice lacking Spo11. *Mol Cell* 6, 989–998.  
831 doi:10.1016/s1097-2765(00)00098-8.
- 832 Benjamini, Y., and Hochberg, Y. (1995). Controlling the False Discovery Rate: A Practical and Powerful  
833 Approach to Multiple Testing. *Journal of the Royal Statistical Society. Series B*  
834 (*Methodological*) 57, 289–300.
- 835 Bie, B., Wang, Y., Li, L., Fang, H., Liu, L., and Sun, J. (2018). Noncoding RNAs: Potential players in the  
836 self-renewal of mammalian spermatogonial stem cells. *Mol Reprod Dev* 85, 720–728.  
837 doi:10.1002/mrd.23041.
- 838 Bolcun-Filas, E., and Schimenti, J. C. (2012). Genetics of meiosis and recombination in mice. *Int Rev*  
839 *Cell Mol Biol* 298, 179–227. doi:10.1016/B978-0-12-394309-5.00005-5.
- 840 Bonavita, R., Walas, D., Brown, A. K., Luini, A., Stephens, D. J., and Colanzi, A. (2014). Cep126 is  
841 required for pericentriolar satellite localisation to the centrosome and for primary cilium  
842 formation. *Biol Cell* 106, 254–267. doi:10.1111/boc.201300087.
- 843 Brannan, C. I., Dees, E. C., Ingram, R. S., and Tilghman, S. M. (1990). The product of the H19 gene may  
844 function as an RNA. *Mol Cell Biol* 10, 28–36. doi:10.1128/mcb.10.1.28.
- 845 Brockdorff, N., Ashworth, A., Kay, G. F., McCabe, V. M., Norris, D. P., Cooper, P. J., et al. (1992). The  
846 product of the mouse Xist gene is a 15 kb inactive X-specific transcript containing no  
847 conserved ORF and located in the nucleus. *Cell* 71, 515–526. doi:10.1016/0092-  
848 8674(92)90519-i.
- 849 Cai, X., and Cullen, B. R. (2007). The imprinted H19 noncoding RNA is a primary microRNA precursor.  
850 *RNA* 13, 313–316. doi:10.1261/rna.351707.
- 851 Carninci, P., Kasukawa, T., Katayama, S., Gough, J., Frith, M. C., Maeda, N., et al. (2005). The  
852 transcriptional landscape of the mammalian genome. *Science* 309, 1559–1563.  
853 doi:10.1126/science.1112014.
- 854 Cesana, M., Cacchiarelli, D., Legnini, I., Santini, T., Sthandier, O., Chinappi, M., et al. (2011). A long  
855 noncoding RNA controls muscle differentiation by functioning as a competing endogenous  
856 RNA. *Cell* 147, 358–369. doi:10.1016/j.cell.2011.09.028.



- 857 Chaleji, V., Sansom, S. N., Kong, L., Lee, S., Montiel, J. F., Vance, K. W., et al. (2014). The long non-  
858 coding RNA Dali is an epigenetic regulator of neural differentiation. *Elife* 3, e04530.  
859 doi:10.7554/eLife.04530.
- 860 Chen, L.-L. (2016). Linking Long Noncoding RNA Localization and Function. *Trends Biochem Sci* 41,  
861 761–772. doi:10.1016/j.tibs.2016.07.003.
- 862 Chen, Y., Zheng, Y., Gao, Y., Lin, Z., Yang, S., Wang, T., et al. (2018a). Single-cell RNA-seq uncovers  
863 dynamic processes and critical regulators in mouse spermatogenesis. *Cell Res* 28, 879–896.  
864 doi:10.1038/s41422-018-0074-y.
- 865 Chen, Y., Zheng, Y., Gao, Y., Lin, Z., Yang, S., Wang, T., et al. (2018b). Single-cell RNA-seq uncovers  
866 dynamic processes and critical regulators in mouse spermatogenesis. *Cell Res* 28, 879–896.  
867 doi:10.1038/s41422-018-0074-y.
- 868 Chotiner, J. Y., Leu, N. A., and Wang, P. J. (2020). FLACC1 is testis-specific but dispensable for fertility  
869 in mice. *Mol Reprod Dev* 87, 1199–1201. doi:10.1002/mrd.23435.
- 870 Chu, C., Qu, K., Zhong, F. L., Artandi, S. E., and Chang, H. Y. (2011). Genomic maps of long noncoding  
871 RNA occupancy reveal principles of RNA-chromatin interactions. *Mol Cell* 44, 667–678.  
872 doi:10.1016/j.molcel.2011.08.027.
- 873 D’Andrea, L. D., and Regan, L. (2003). TPR proteins: the versatile helix. *Trends Biochem Sci* 28, 655–  
874 662. doi:10.1016/j.tibs.2003.10.007.
- 875 Darde, T. A., Lecluze, E., Lardenois, A., Stévant, I., Alary, N., Tüttelmann, F., et al. (2019). The  
876 ReproGenomics Viewer: a multi-omics and cross-species resource compatible with single-cell  
877 studies for the reproductive science community. *Bioinformatics* 35, 3133–3139.  
878 doi:10.1093/bioinformatics/btz047.
- 879 Darde, T. A., Sallou, O., Becker, E., Evrard, B., Monjeaud, C., Le Bras, Y., et al. (2015). The  
880 ReproGenomics Viewer: an integrative cross-species toolbox for the reproductive science  
881 community. *Nucleic Acids Res* 43, W109-116. doi:10.1093/nar/gkv345.
- 882 Drumond, A. L., Meistrich, M. L., and Chiarini-Garcia, H. (2011). Spermatogonial morphology and  
883 kinetics during testis development in mice: a high-resolution light microscopy approach.  
884 *Reproduction* 142, 145–155. doi:10.1530/REP-10-0431.
- 885 Eaker, S., Cobb, J., Pyle, A., and Handel, M. A. (2002). Meiotic prophase abnormalities and metaphase  
886 cell death in MLH1-deficient mouse spermatocytes: insights into regulation of spermatogenic  
887 progress. *Dev Biol* 249, 85–95. doi:10.1006/dbio.2002.0708.
- 888 Edelman, W., Cohen, P. E., Kneitz, B., Winand, N., Lia, M., Heyer, J., et al. (1999). Mammalian MutS  
889 homologue 5 is required for chromosome pairing in meiosis. *Nat Genet* 21, 123–127.  
890 doi:10.1038/5075.
- 891 ENCODE Project Consortium, Birney, E., Stamatoyannopoulos, J. A., Dutta, A., Guigó, R., Gingeras, T.  
892 R., et al. (2007). Identification and analysis of functional elements in 1% of the human genome  
893 by the ENCODE pilot project. *Nature* 447, 799–816. doi:10.1038/nature05874.
- 894 Gil, R., and Latorre, A. (2012). Factors behind junk DNA in bacteria. *Genes (Basel)* 3, 634–650.  
895 doi:10.3390/genes3040634.

- 896 Han, J., Zhang, J., Chen, L., Shen, B., Zhou, J., Hu, B., et al. (2014). Efficient in vivo deletion of a large  
897 imprinted lncRNA by CRISPR/Cas9. *RNA Biol* 11, 829–835. doi:10.4161/rna.29624.
- 898 Handel, M. A., and Eppig, J. J. (1998). Sexual dimorphism in the regulation of mammalian meiosis.  
899 *Curr Top Dev Biol* 37, 333–358. doi:10.1016/s0070-2153(08)60179-9.
- 900 Handel, M. A., and Schimenti, J. C. (2010). Genetics of mammalian meiosis: regulation, dynamics and  
901 impact on fertility. *Nat Rev Genet* 11, 124–136. doi:10.1038/nrg2723.
- 902 He, X., Xie, W., Li, H., Cui, Y., Wang, Y., Guo, X., et al. (2020). The testis-specifically expressed gene  
903 Trim69 is not essential for fertility in mice. *J Biomed Res* 35, 47–60.  
904 doi:10.7555/JBR.34.20200069.
- 905 Hellemans, J., Mortier, G., De Paepe, A., Speleman, F., and Vandesompele, J. (2007). qBase relative  
906 quantification framework and software for management and automated analysis of real-time  
907 quantitative PCR data. *Genome Biol* 8, R19. doi:10.1186/gb-2007-8-2-r19.
- 908 Henao-Mejia, J., Williams, A., Rongvaux, A., Stein, J., Hughes, C., and Flavell, R. A. (2016). Generation  
909 of Genetically Modified Mice Using the CRISPR-Cas9 Genome-Editing System. *Cold Spring Harb*  
910 *Protoc* 2016, pdb.prot090704. doi:10.1101/pdb.prot090704.
- 911 Huang, D. W., Sherman, B. T., and Lempicki, R. A. (2009a). Systematic and integrative analysis of large  
912 gene lists using DAVID bioinformatics resources. *Nat Protoc* 4, 44–57.  
913 doi:10.1038/nprot.2008.211.
- 914 Huang, D. W., Sherman, B. T., Zheng, X., Yang, J., Imamichi, T., Stephens, R., et al. (2009b). Extracting  
915 biological meaning from large gene lists with DAVID. *Curr Protoc Bioinformatics* Chapter 13,  
916 Unit 13.11. doi:10.1002/0471250953.bi1311s27.
- 917 Iwamori, N., Zhao, M., Meistrich, M. L., and Matzuk, M. M. (2011). The testis-enriched histone  
918 demethylase, KDM4D, regulates methylation of histone H3 lysine 9 during spermatogenesis in  
919 the mouse but is dispensable for fertility. *Biol Reprod* 84, 1225–1234.  
920 doi:10.1095/biolreprod.110.088955.
- 921 Jamin, S. P., Petit, F. G., Demini, L., and Primig, M. (2021). Tex55 encodes a conserved putative A-  
922 kinase anchoring protein dispensable for male fertility in the mouse. *Biol Reprod*.  
923 doi:10.1093/biolre/ioab007.
- 924 Jarroux, J., Morillon, A., and Pinskaya, M. (2017). History, Discovery, and Classification of lncRNAs.  
925 *Adv Exp Med Biol* 1008, 1–46. doi:10.1007/978-981-10-5203-3\_1.
- 926 Johnson, W. H. (1997). The significance to bull fertility of morphologically abnormal sperm. *Vet Clin*  
927 *North Am Food Anim Pract* 13, 255–270. doi:10.1016/s0749-0720(15)30339-x.
- 928 Karpenahalli, M. R., Lupas, A. N., and Söding, J. (2007). TPRpred: a tool for prediction of TPR-, PPR-  
929 and SEL1-like repeats from protein sequences. *BMC Bioinformatics* 8, 2. doi:10.1186/1471-  
930 2105-8-2.
- 931 Kashihara, H., Chiba, S., Kanno, S.-I., Suzuki, K., Yano, T., and Tsukita, S. (2019). Cep128 associates  
932 with Odf2 to form the subdistal appendage of the centriole. *Genes Cells* 24, 231–243.  
933 doi:10.1111/gtc.12668.

- 934 Khan, M., Jabeen, N., Khan, T., Hussain, H. M. J., Ali, A., Khan, R., et al. (2018). The evolutionarily  
935 conserved genes: *Tex37*, *Ccdc73*, *Prss55* and *Nxt2* are dispensable for fertility in mice. *Sci Rep*  
936 8, 4975. doi:10.1038/s41598-018-23176-x.
- 937 Khan, R., Ye, J., Yousaf, A., Shah, W., Aftab, A., Shah, B., et al. (2020). Evolutionarily conserved and  
938 testis-specific gene, *4930524B15Rik*, is not essential for mouse spermatogenesis and fertility.  
939 *Mol Biol Rep* 47, 5207–5213. doi:10.1007/s11033-020-05595-0.
- 940 Kleckner, N. (1996). Meiosis: how could it work? *Proc Natl Acad Sci U S A* 93, 8167–8174.  
941 doi:10.1073/pnas.93.16.8167.
- 942 Kneitz, B., Cohen, P. E., Avdievich, E., Zhu, L., Kane, M. F., Hou, H., et al. (2000). MutS homolog 4  
943 localization to meiotic chromosomes is required for chromosome pairing during meiosis in  
944 male and female mice. *Genes Dev* 14, 1085–1097.
- 945 Kurihara, M., Otsuka, K., Matsubara, S., Shiraishi, A., Satake, H., and Kimura, A. P. (2017). A Testis-  
946 Specific Long Non-Coding RNA, *lncRNA-Tcam1*, Regulates Immune-Related Genes in Mouse  
947 Male Germ Cells. *Front Endocrinol (Lausanne)* 8, 299. doi:10.3389/fendo.2017.00299.
- 948 Li, B., Nair, M., Mackay, D. R., Bilanchone, V., Hu, M., Fallahi, M., et al. (2005). *Ovo1* regulates  
949 meiotic pachytene progression during spermatogenesis by repressing *Id2* expression.  
950 *Development* 132, 1463–1473. doi:10.1242/dev.01658.
- 951 Li, C., Shen, C., Shang, X., Tang, L., Xiong, W., Ge, H., et al. (2020). Two novel testis-specific long  
952 noncoding RNAs produced by *1700121C10Rik* are dispensable for male fertility in mice. *J*  
953 *Reprod Dev* 66, 57–65. doi:10.1262/jrd.2019-104.
- 954 Li, K., Xu, J., Luo, Y., Zou, D., Han, R., Zhong, S., et al. (2021). Panoramic transcriptome analysis and  
955 functional screening of long noncoding RNAs in mouse spermatogenesis. *Genome Res* 31, 13–  
956 26. doi:10.1101/gr.264333.120.
- 957 Liao, Y., Smyth, G. K., and Shi, W. (2014). featureCounts: an efficient general purpose program for  
958 assigning sequence reads to genomic features. *Bioinformatics* 30, 923–930.  
959 doi:10.1093/bioinformatics/btt656.
- 960 Lipkin, S. M., Moens, P. B., Wang, V., Lenzi, M., Shanmugarajah, D., Gilgeous, A., et al. (2002). Meiotic  
961 arrest and aneuploidy in *MLH3*-deficient mice. *Nat Genet* 31, 385–390. doi:10.1038/ng931.
- 962 Liu, D., Matzuk, M. M., Sung, W. K., Guo, Q., Wang, P., and Wolgemuth, D. J. (1998). Cyclin A1 is  
963 required for meiosis in the male mouse. *Nat Genet* 20, 377–380. doi:10.1038/3855.
- 964 Liu, W., He, X., Yang, S., Zouari, R., Wang, J., Wu, H., et al. (2019). Bi-allelic Mutations in *TTC21A*  
965 Induce Asthenoteratospermia in Humans and Mice. *Am J Hum Genet* 104, 738–748.  
966 doi:10.1016/j.ajhg.2019.02.020.
- 967 Love, M. I., Huber, W., and Anders, S. (2014). Moderated estimation of fold change and dispersion  
968 for RNA-seq data with DESeq2. *Genome Biol* 15, 550. doi:10.1186/s13059-014-0550-8.
- 969 Lu, Y., Oura, S., Matsumura, T., Oji, A., Sakurai, N., Fujihara, Y., et al. (2019). CRISPR/Cas9-mediated  
970 genome editing reveals 30 testis-enriched genes dispensable for male fertility in mice<sup>†</sup>. *Biol*  
971 *Reprod* 101, 501–511. doi:10.1093/biolre/ioz103.

- 972 Luangpraseuth-Prosper, A., Lesueur, E., Jouneau, L., Pailhoux, E., Cotinot, C., and Mandon-Pépin, B.  
973 (2015). TOPAZ1, a germ cell specific factor, is essential for male meiotic progression. *Dev Biol*  
974 406, 158–171. doi:10.1016/j.ydbio.2015.09.002.
- 975 Malcov, M., Cesarkas, K., Stelzer, G., Shalom, S., Dicken, Y., Naor, Y., et al. (2004). Aym1, a mouse  
976 meiotic gene identified by virtue of its ability to activate early meiotic genes in the yeast  
977 *Saccharomyces cerevisiae*. *Dev Biol* 276, 111–123. doi:10.1016/j.ydbio.2004.08.026.
- 978 Marjanović, M., Sánchez-Huertas, C., Terré, B., Gómez, R., Scheel, J. F., Pacheco, S., et al. (2015).  
979 CEP63 deficiency promotes p53-dependent microcephaly and reveals a role for the  
980 centrosome in meiotic recombination. *Nat Commun* 6, 7676. doi:10.1038/ncomms8676.
- 981 Miyata, H., Castaneda, J. M., Fujihara, Y., Yu, Z., Archambeault, D. R., Isotani, A., et al. (2016).  
982 Genome engineering uncovers 54 evolutionarily conserved and testis-enriched genes that are  
983 not required for male fertility in mice. *Proc Natl Acad Sci U S A* 113, 7704–7710.  
984 doi:10.1073/pnas.1608458113.
- 985 Miyata, H., Morohoshi, A., and Ikawa, M. (2020a). Analysis of the sperm flagellar axoneme using  
986 gene-modified mice. *Exp Anim* 69, 374–381. doi:10.1538/expanim.20-0064.
- 987 Miyata, H., Shimada, K., Morohoshi, A., Oura, S., Matsumura, T., Xu, Z., et al. (2020b). Testis-enriched  
988 kinesin KIF9 is important for progressive motility in mouse spermatozoa. *FASEB J* 34, 5389–  
989 5400. doi:10.1096/fj.201902755R.
- 990 Monesi, V. (1964). RIBONUCLEIC ACID SYNTHESIS DURING MITOSIS AND MEIOSIS IN THE MOUSE  
991 TESTIS. *J Cell Biol* 22, 521–532. doi:10.1083/jcb.22.3.521.
- 992 Moniot, B., Declosmenil, F., Barrionuevo, F., Scherer, G., Aritake, K., Malki, S., et al. (2009). The PGD2  
993 pathway, independently of FGF9, amplifies SOX9 activity in Sertoli cells during male sexual  
994 differentiation. *Development* 136, 1813–1821. doi:10.1242/dev.032631.
- 995 Mönnich, M., Borgeskov, L., Breslin, L., Jakobsen, L., Rogowski, M., Doganli, C., et al. (2018). CEP128  
996 Localizes to the Subdistal Appendages of the Mother Centriole and Regulates TGF- $\beta$ /BMP  
997 Signaling at the Primary Cilium. *Cell Rep* 22, 2584–2592. doi:10.1016/j.celrep.2018.02.043.
- 998 Morelli, M. A., and Cohen, P. E. (2005). Not all germ cells are created equal: aspects of sexual  
999 dimorphism in mammalian meiosis. *Reproduction* 130, 761–781. doi:10.1530/rep.1.00865.
- 1000 Morris, K. V., and Mattick, J. S. (2014). The rise of regulatory RNA. *Nat Rev Genet* 15, 423–437.  
1001 doi:10.1038/nrg3722.
- 1002 Mountain, V., and Compton, D. A. (2000). Dissecting the role of molecular motors in the mitotic  
1003 spindle. *Anat Rec* 261, 14–24. doi:10.1002/(SICI)1097-0185(20000215)261:1<14::AID-  
1004 AR5>3.0.CO;2-E.
- 1005 Necsulea, A., and Kaessmann, H. (2014). Evolutionary dynamics of coding and non-coding  
1006 transcriptomes. *Nat Rev Genet* 15, 734–748. doi:10.1038/nrg3802.
- 1007 Necsulea, A., Soumillon, M., Warnefors, M., Liechti, A., Daish, T., Zeller, U., et al. (2014). The  
1008 evolution of lncRNA repertoires and expression patterns in tetrapods. *Nature* 505, 635–640.  
1009 doi:10.1038/nature12943.

- 1010 Oldknow, K. J., Seebacher, J., Goswami, T., Villen, J., Pitsillides, A. A., O’Shaughnessy, P. J., et al.  
1011 (2013). Follistatin-like 3 (FSTL3) mediated silencing of transforming growth factor  $\beta$  (TGF $\beta$ )  
1012 signaling is essential for testicular aging and regulating testis size. *Endocrinology* 154, 1310–  
1013 1320. doi:10.1210/en.2012-1886.
- 1014 Page, J., de la Fuente, R., Manterola, M., Parra, M. T., Viera, A., Berríos, S., et al. (2012). Inactivation  
1015 or non-reactivation: what accounts better for the silence of sex chromosomes during  
1016 mammalian male meiosis? *Chromosoma* 121, 307–326. doi:10.1007/s00412-012-0364-y.
- 1017 Pittman, D. L., Cobb, J., Schimenti, K. J., Wilson, L. A., Cooper, D. M., Brignull, E., et al. (1998). Meiotic  
1018 prophase arrest with failure of chromosome synapsis in mice deficient for Dmc1, a germline-  
1019 specific RecA homolog. *Mol Cell* 1, 697–705. doi:10.1016/s1097-2765(00)80069-6.
- 1020 Quan, G., and Li, J. (2018). Circular RNAs: biogenesis, expression and their potential roles in  
1021 reproduction. *J Ovarian Res* 11, 9. doi:10.1186/s13048-018-0381-4.
- 1022 Reinholdt, L. G., and Schimenti, J. C. (2005). Mei1 is epistatic to Dmc1 during mouse meiosis.  
1023 *Chromosoma* 114, 127–134. doi:10.1007/s00412-005-0346-4.
- 1024 Rey-Ares, V., Rossi, S. P., Dietrich, K.-G., Köhn, F.-M., Schwarzer, J. U., Welter, H., et al. (2018).  
1025 Prostaglandin E2 (PGE2) is a testicular peritubular cell-derived factor involved in human  
1026 testicular homeostasis. *Mol Cell Endocrinol* 473, 217–224. doi:10.1016/j.mce.2018.01.022.
- 1027 Romanienko, P. J., and Camerini-Otero, R. D. (2000). The mouse Spo11 gene is required for meiotic  
1028 chromosome synapsis. *Mol Cell* 6, 975–987. doi:10.1016/s1097-2765(00)00097-6.
- 1029 Sarropoulos, I., Marin, R., Cardoso-Moreira, M., and Kaessmann, H. (2019). Developmental dynamics  
1030 of lncRNAs across mammalian organs and species. *Nature* 571, 510–514. doi:10.1038/s41586-  
1031 019-1341-x.
- 1032 Schmitz-Linneweber, C., and Small, I. (2008). Pentatricopeptide repeat proteins: a socket set for  
1033 organelle gene expression. *Trends Plant Sci* 13, 663–670. doi:10.1016/j.tplants.2008.10.001.
- 1034 Shamoto, N., Narita, K., Kubo, T., Oda, T., and Takeda, S. (2018). CFAP70 Is a Novel Axoneme-Binding  
1035 Protein That Localizes at the Base of the Outer Dynein Arm and Regulates Ciliary Motility. *Cells*  
1036 7. doi:10.3390/cells7090124.
- 1037 Shibuya, H., and Watanabe, Y. (2014). The meiosis-specific modification of mammalian telomeres.  
1038 *Cell Cycle* 13, 2024–2028. doi:10.4161/cc.29350.
- 1039 Sleutels, F., Zwart, R., and Barlow, D. P. (2002). The non-coding Air RNA is required for silencing  
1040 autosomal imprinted genes. *Nature* 415, 810–813. doi:10.1038/415810a.
- 1041 Soumillon, M., Necsulea, A., Weier, M., Brawand, D., Zhang, X., Gu, H., et al. (2013). Cellular source  
1042 and mechanisms of high transcriptome complexity in the mammalian testis. *Cell Rep* 3, 2179–  
1043 2190. doi:10.1016/j.celrep.2013.05.031.
- 1044 Su, Y., Li, Y., and Ye, P. (2011). Mammalian meiosis is more conserved by sex than by species:  
1045 conserved co-expression networks of meiotic prophase. *Reproduction* 142, 675–687.  
1046 doi:10.1530/REP-11-0260.

- 1047 Sutton, K. A., Jungnickel, M. K., and Florman, H. M. (2008). A polycystin-1 controls postcopulatory  
1048 reproductive selection in mice. *Proc Natl Acad Sci U S A* 105, 8661–8666.  
1049 doi:10.1073/pnas.0800603105.
- 1050 Takaishi, M., and Huh, N. h (1999). A tetratricopeptide repeat-containing protein gene, *tpis*, whose  
1051 expression is induced with differentiation of spermatogenic cells. *Biochem Biophys Res*  
1052 *Commun* 264, 81–85. doi:10.1006/bbrc.1999.1477.
- 1053 Tarulli, G. A., Stanton, P. G., Lerchl, A., and Meachem, S. J. (2006). Adult sertoli cells are not  
1054 terminally differentiated in the Djungarian hamster: effect of FSH on proliferation and  
1055 junction protein organization. *Biol Reprod* 74, 798–806. doi:10.1095/biolreprod.105.050450.
- 1056 Toyooka, Y., Tsunekawa, N., Takahashi, Y., Matsui, Y., Satoh, M., and Noce, T. (2000). Expression and  
1057 intracellular localization of mouse Vasa-homologue protein during germ cell development.  
1058 *Mech Dev* 93, 139–149. doi:10.1016/s0925-4773(00)00283-5.
- 1059 Trapnell, C., Pachter, L., and Salzberg, S. L. (2009). TopHat: discovering splice junctions with RNA-Seq.  
1060 *Bioinformatics* 25, 1105–1111. doi:10.1093/bioinformatics/btp120.
- 1061 Tsai, M.-C., Manor, O., Wan, Y., Mosammamparast, N., Wang, J. K., Lan, F., et al. (2010). Long  
1062 noncoding RNA as modular scaffold of histone modification complexes. *Science* 329, 689–693.  
1063 doi:10.1126/science.1192002.
- 1064 Vedrenne, C., and Hauri, H.-P. (2006). Morphogenesis of the endoplasmic reticulum: beyond active  
1065 membrane expansion. *Traffic* 7, 639–646. doi:10.1111/j.1600-0854.2006.00419.x.
- 1066 Wang, F., Kong, S., Hu, X., Li, X., Xu, B., Yue, Q., et al. (2020). *Dnajb8*, a target gene of SOX30, is  
1067 dispensable for male fertility in mice. *PeerJ* 8, e10582. doi:10.7717/peerj.10582.
- 1068 Wen, K., Yang, L., Xiong, T., Di, C., Ma, D., Wu, M., et al. (2016). Critical roles of long noncoding RNAs  
1069 in *Drosophila* spermatogenesis. *Genome Res* 26, 1233–1244. doi:10.1101/gr.199547.115.
- 1070 Wichman, L., Somasundaram, S., Breindel, C., Valerio, D. M., McCarrey, J. R., Hodges, C. A., et al.  
1071 (2017). Dynamic expression of long noncoding RNAs reveals their potential roles in  
1072 spermatogenesis and fertility. *Biol Reprod* 97, 313–323. doi:10.1093/biolre/iox084.
- 1073 Yadav, R. P., and Kotaja, N. (2014). Small RNAs in spermatogenesis. *Mol Cell Endocrinol* 382, 498–508.  
1074 doi:10.1016/j.mce.2013.04.015.
- 1075 Yuan, L., Liu, J. G., Zhao, J., Brundell, E., Daneholt, B., and Höög, C. (2000). The murine SCP3 gene is  
1076 required for synaptonemal complex assembly, chromosome synapsis, and male fertility. *Mol*  
1077 *Cell* 5, 73–83. doi:10.1016/s1097-2765(00)80404-9.
- 1078 Zhang, B., Arun, G., Mao, Y. S., Lazar, Z., Hung, G., Bhattacharjee, G., et al. (2012). The lncRNA Malat1  
1079 is dispensable for mouse development but its transcription plays a cis-regulatory role in the  
1080 adult. *Cell Rep* 2, 111–123. doi:10.1016/j.celrep.2012.06.003.
- 1081 Zhang, L., Lu, H., Xin, D., Cheng, H., and Zhou, R. (2010). A novel ncRNA gene from mouse  
1082 chromosome 5 trans-splices with *Dmrt1* on chromosome 19. *Biochem Biophys Res Commun*  
1083 400, 696–700. doi:10.1016/j.bbrc.2010.08.130.

1084 Zhu, Y., Lin, Y., He, Y., Wang, H., Chen, S., Li, Z., et al. (2020). Deletion of lncRNA5512 has no effect on  
1085 spermatogenesis and reproduction in mice. *Reprod Fertil Dev* 32, 706–713.  
1086 doi:10.1071/RD19246.

1087

## 1088 **Supporting information**

1089 **Supplementary Figure 1.** Validation of several DEGs by RT-qPCR (RNA-seq *Topaz1*<sup>-/-</sup> vs WT testes).  
1090 Validation of several differentially expressed up- or down-regulated genes and of non-DEGs from RNA-  
1091 seq analysis by qRT-PCR from P16 (A) or P18 (B) mouse testis RNAs. The lines represent the median of  
1092 each genotype (blue: WT; red: *Topaz1*<sup>-/-</sup>). A Kruskal-Wallis statistical test was performed (\*p<0.05).

1093

1094 **Supplementary Figure 2.** Abnormal centrosome labeling in *Topaz1*-deficient gonads.

1095 Immunofluorescence staining for  $\gamma$ -TUBULIN (red) and DAPI (blue) in WT (left) and *Topaz1*<sup>-/-</sup> (right) 30  
1096 *dpp* testes sections. Unlike the two red dots locating centrosomes in the meiotic metaphases seen in  
1097 normal testes (left), centrosomes are abnormal in *Topaz1*<sup>-/-</sup> mutants (right) with one diffuse labeling.  
1098 Zooms in white squares show spermatocytes in metaphase I (WT) or in metaphase I-like (*Topaz1*<sup>-/-</sup>)  
1099 spermatocytes. Scale bar = 50 $\mu$ m.

1100

1101 **Supplementary Figure 3.** Reprognomic data on the dynamic expression of *4930463O16Rik*. The  
1102 dynamic expression of *4930463O16Rik* in five different tissues from male and female adult mice (A),  
1103 and in embryonic primordial germ cells and adult male germ cells (B). *4930463O16Rik* is expressed in  
1104 testes in germ cells during post-natal life. The strongest dynamic expression is found in pachytene  
1105 spermatocytes.

1106

1107 **Supplementary Figure 4.** Reprognomic data on the dynamic expression of *Gm21269*. The dynamic  
1108 expression of *Gm21269* in five different tissues from male and female adult mice (A), in embryonic  
1109 primordial germ cells and adult male germ cells (B). *Gm21269* is expressed in testes in germ cells during  
1110 post-natal life. The strongest dynamic expression is found in pachytene spermatocytes.

1111

1112 **Supplementary Figure 5.** IGV representation of P18-testis RNA-seq. Expression of *4930463O16Rik* (A),  
1113 *Gm21269* (B) and *4921513H07Rik* (C) from BigWig files of strand-specific RNA-seq data. The first four  
1114 tracks represent transcripts of WT testes at P18; the next three tracks represent transcripts of *Topaz1*<sup>-</sup>  
1115 <sup>-</sup> testes at the same developmental stage. Representations of the genes (from mm10 or GRCm38) are  
1116 shown at the bottom of each graph. A representation of the size of *4930463O16Rik* (A), *Gm21269* (B)  
1117 and *4921513H07Rik* (C) transcripts (red) from Ensembl data (GRCm38) is shown at the top.  
1118 *4930463O16Rik* and *4921513H07Rik* gene transcriptions overlap in 3' or 5', respectively.

1119

1120 **Supplementary Figure 6.** Expression of *Gm21269*, *4930463O16Rik* and *4921513H07Rik* mRNAs in testes  
1121 from 5 days to adulthood. Quantitative RT-PCR analysis of *Gm21269*, *4930463O16Rik* and  
1122 *4921513H07Rik* gene expressions at different developmental stages in WT (blue) and *Topaz1*<sup>-</sup> (red)  
1123 testes. The lines represent the median of each genotype. A Kruskal-Wallis statistical test was  
1124 performed (\*p<0.05; \*\*p<0.01).

1125

1126 **Supplementary Figure 7.** ISH with PAS counterstained in WT mouse testes. Visualization of  
1127 *4930463O16Rik* (A), *Gm21269* (B) and *4921513H07Rik* (C) mRNAs, respectively, by ISH at different  
1128 seminiferous epithelium stages highlighted by PAS staining. Scale bar = 20µm

1129

1130 **Supplementary Figure 8.** lncRNA cellular localizations in testes from two month-old WT mice. ISH  
1131 using (A) *4930463O16Rik*, (D) *Gm21269* and (G) *4921513H07Rik* probes (red). (B-E-H)  
1132 Immunofluorescence staining with γH2Ax antibody was performed at the same stage of seminiferous  
1133 epithelium to identify male germ cells (green). (C-F-I) DAPI (blue), visualizing nuclear chromosomes,  
1134 was merged with ISH (green) and IF (red) signals. Zooms in white squares show spermatocytes during  
1135 prophase I. No colocalization between the sex body (γH2Ax) and lncRNAs (red) was evident. Scale bar =  
1136 20 µm.



1137

1138 **Supplementary Figure 9.** Validation of several DEGs by RT-qPCR (RNA-seq *4930463O16Rik<sup>-/-</sup>* vs WT  
1139 testes). Validation of several differentially expressed up- or down-regulated genes and of non-DEGs of  
1140 RNA-seq analysis by RT-qPCR from P16 (A) or P18 (B) mouse testis RNAs. The lines represent the  
1141 median of each genotype (blue: WT; red: *4930463O16Rik<sup>-/-</sup>*). A Kruskal-Wallis statistical test was  
1142 performed (\*p<0.05).

1143

1144 **Supplementary Table 1.** List of DEGs in *Topaz1<sup>-/-</sup>* testes compared to WT. List of deregulated genes in  
1145 *Topaz1* KO testes at P16 (sheet 1) and P18 (sheet 2) (adjusted p-value <0.05 and absolute Log2FC>1).

1146

1147 **Supplementary Table 2.** Functional annotation of P16 DEGs (RNA-seq *Topaz1<sup>-/-</sup>* vs WT testes). DAVID  
1148 functional Annotation Clustering (DAVID 6.8) analysis (based on GO terms and KEGG pathway) of all  
1149 P16-differentially expressed genes (sheet 1) or only up-regulated DEGs (sheet 2) or down-regulated  
1150 DEGs (sheet 3) in *Topaz1<sup>-/-</sup>* testes.

1151

1152 **Supplementary Table 3.** Functional annotation of P18 DEGs (RNA-seq *Topaz1<sup>-/-</sup>* vs WT testes). DAVID  
1153 functional Annotation Clustering (DAVID 6.8) analysis (based on GO terms and KEGG pathway) of P18-  
1154 differentially expressed genes (sheet 1) or only up-regulated DEGs (sheet 2) or down-regulated DEGs  
1155 (sheet 3) in *Topaz1<sup>-/-</sup>* testes. Annotation clusters based on the InterPro database of P18-down-  
1156 regulated DEGs are mentioned in sheet 4.

1157

1158 **Supplementary Table 4.** List of primers. List of different primers used during this study for genotyping,  
1159 RT-qPCR and gRNAs.

1160

1161 **Supplementary Table 5.** List of DEGs in *4930463O16Rik*<sup>-/-</sup> testes compared to WT. List of deregulated  
1162 genes in *4930463O16Rik* KO testes at P16 (sheet 1) and P18 (sheet 2) (adjusted p-value <0.05 and  
1163 absolute Log<sub>2</sub>FC>1).

1164

1165 **Supplementary Table 6.** Functional annotation of P18 DEGs (RNA-seq *4930463O16Rik*<sup>-/-</sup> vs WT testes).  
1166 DAVID functional Annotation Clustering (DAVID 6.8) analysis of P18-differentially expressed genes  
1167 (sheet 1) or only up-regulated (sheet 2) or down-regulated DEGs (sheet 3) in *4930463O16Rik*<sup>-/-</sup> testes.

1168

1169 **Supplementary Table 7.** Casa system settings.

1170
